# 1 **A long non-coding RNA is a key factor in the evolution of insect eusociality**

2

3 Carlos A. M. Cardoso-Junior<sup>1,7</sup>, Gustavo J. Tibério<sup>1,7</sup>, Denyse C. Lago<sup>2</sup>, Luiz Carlos Vieira<sup>1</sup>,  
4 José C. Rosa<sup>1</sup>, Alexandre R. Paschoal<sup>3</sup>, Isobel Ronai<sup>4</sup>, Benjamin P. Oldroyd<sup>4,5</sup>, Klaus  
5 Hartfelder<sup>1,2,6,\*</sup>

6

7 <sup>1</sup> Departamento de Biologia Celular e Molecular, Faculdade de Medicina de Ribeirão Preto,  
8 Universidade de São Paulo, Ribeirão Preto, SP, Brazil. <sup>2</sup> Departamento de Genética,  
9 Faculdade de Medicina de Ribeirão Preto, Universidade de São Paulo, Ribeirão Preto, SP,  
10 Brazil. <sup>3</sup> Universidade Tecnológica Federal do Paraná, Cornélio Procópio, PR, Brazil. <sup>4</sup>  
11 Behaviour, Ecology and Evolution (BEE) laboratory, Macleay Building A12, University of  
12 Sydney, Sydney NSW 2006, Australia. <sup>5</sup> Wissenschaftskolleg zu Berlin, Wallotstrasse 19 D-  
13 14193, Berlin, Germany. <sup>6</sup> Lead contact. <sup>7</sup> These authors contributed equally. \*  
14 Correspondence: klaus@fmrp.usp.br.

15

## 16 **This PDF file contains**

17 Main text

18 Figures 1 to 5

19 Supplementary Figures 1 to 5

20 Supplementary Tables 1 to 8

21 Supplementary Material 1 to 2

22

## 23 **AUTHOR CONTRIBUTIONS**

24 CAM designed, conceived, performed and analyzed the experiments on adult bees, helped in  
25 the pulldown assay, cloned and sequenced the full-length *lncov1* sequence, designed the  
26 RNA-seq analyses together with LCV and wrote the manuscript draft together with KH. GJT  
27 conceived, designed the study, performed and analyzed the larval experiments. DCL  
28 performed the JH treatment experiment, analyzed FISH assays together with GJT and  
29 quantified the caste-specific *Tudor-SN* gene expression. LCV performed the bioinformatic  
30 analyses for RNA-seq datasets. JCR and GJT performed the mass spectrometry analysis. IR  
31 helped in gene expression analyses of adult honey bees and in the setting up of the cages for  
32 the diet and QMP treatments. BPO designed the experiments with adult bees together with  
33 CAM, performed social manipulations in field colonies, and supervised the study. ARP  
34 performed the bioinformatics analysis on the conservation of the *lncov1* gene. KH conceived,  
35 designed, supervised the study, and, together with CAM drafted the manuscript. All authors  
36 contributed critically to this paper and approved the final version.

37

38

39 **SUMMARY**

40 Insect sociality is a major evolutionary transition based on the suppression of worker  
41 reproduction in favor of the reproductive monopoly of the queen. In the honey bee (*Apis*  
42 *mellifera*) model organism, the development of the two female caste phenotypes, queen and  
43 worker, is triggered by differences in their larval diets. However, the mechanistic details  
44 underlying their respective developmental trajectories, as well as the maintenance of sterility  
45 in the adult workers, are still not fully understood. Here we show that the long non-coding  
46 RNA *lncov1* interacts with the Tudor staphylococcus nuclease (Tudor-SN) protein to form a  
47 regulatory module that promotes apoptosis in the ovaries of worker larvae. In adult workers,  
48 the *lncov1*/Tudor-SN module responds positively to environmental cues that suppress  
49 reproductive capacity. As *lncov1* is considerably conserved in the Apidae, we propose that,  
50 by promoting worker sterility, the *lncov1*/Tudor-SN module has likely played critical roles in  
51 the social evolution of bees.

52

53 **Keywords:** Honeybees, reproductive division of labor, queen mandibular pheromone (QMP),  
54 lncRNA, royal jelly, epigenetics.

55

56

57

58

## 59 INTRODUCTION

60           Sociality in insects is a major evolutionary transition that has occurred independently  
61 in the Hymenoptera (bees, wasps, and ants), and in the cockroach-related termites (Isoptera).  
62 The apex of sociality in the Hymenoptera is marked by the presence of morphologically and  
63 physiologically distinct female castes, the queen and the worker (Korb and Heinze, 2016;  
64 Linksvayer and Johnson, 2019). These are mutually dependent, particularly during the sessile  
65 phase of the colony life cycle. This strong interdependence represents an evolutionary point  
66 of no return, as it prevents the reversion to a communal or even solitary life history  
67 (Boomsma and Gawne, 2018; Wilson and Hölldobler, 2005). Species with such reproductive  
68 division of labor are referred to as being ‘eusocial’ (Michener, 1974; Sherman et al., 1995;  
69 Thompson and Oldroyd, 2004) and, specifically, as highly eusocial when they have  
70 morphologically distinct castes.

71           There are two major open questions concerning the female caste dimorphism in  
72 eusocial insects: (a) how did social insects go beyond phenotypic plasticity to stably generate  
73 the two irreversibly distinct castes (Sommer, 2020), and (b), what is the configuration of the  
74 regulatory networks that drive the divergent ontogenetic pathways of the two castes  
75 (Friedman et al., 2020)? Previous studies have examined a set of bee species that span the full  
76 spectrum of social organization from solitary to the highly eusocial (Fischman et al., 2011;  
77 Kapheim et al., 2020; Rehan and Toth, 2015). These comparative transcriptomic and  
78 genomic analyses have identified gene families and molecular signatures potentially  
79 associated with the evolution of eusociality. In addition, epigenetic mechanisms, as key  
80 regulators of chromatin activity (Allis and Jenuwein, 2016), have been proposed to play roles  
81 in the morphological, physiological and behavioral differentiation between and within  
82 genetically identical females (Alvarado et al., 2015; Duncan et al., 2020; Kucharski et al.,  
83 2008). Yet, understanding how these genes are functionally integrated into regulatory gene

84 and epigenetic networks for building the alternative caste phenotypes remains a challenging  
85 task, even in the model organism for insect sociality, the Western honey bee, *Apis mellifera*  
86 L. (Barchuk et al., 2007; Cameron et al., 2013; Evans and Wheeler, 1999; Foret et al., 2012;  
87 Wojciechowski et al., 2018). A major hurdle to be overcome in this context is to distinguish  
88 between regulatory pathways involved in driving general body growth (queens are larger than  
89 workers) from those that coordinate the caste-specific development of tissues and organs,  
90 especially in the female reproductive system.

91         The most remarkable caste difference between honey bee queens and workers lies in  
92 the anatomical architecture of their reproductive systems, particularly their ovaries. While  
93 each of the paired ovaries of an adult honey bee queen contains on average 150 ovarioles (the  
94 filamentous units comprising the insect ovary), those of a typical worker bee contain on  
95 average only two to four ovarioles (Leimar et al., 2012). Yet, as young larvae, queens and  
96 workers start out equally, with the same number of ovariole primordia. It is only during the  
97 transition from the penultimate (fourth) to the last (fifth) larval instar that a massive  
98 programmed cell death (PCD) destroys well over 90% of the ovariole primordia in workers  
99 (Hartfelder et al., 2018). These PCD events are inhibited by a topical application of synthetic  
100 juvenile hormone-III (Schmidt-Capella and Hartfelder, 1998) (JH), an insect hormone that,  
101 together with ecdysteroids, orchestrates the postembryonic molts in insects (Bellés, 2020).  
102 Elevated JH levels in the hemolymph of young queen honey bee larvae is critical for  
103 protecting their ovaries from PCD, resulting in the large ovary phenotype (Rachinsky et al.,  
104 1990). Despite PCD events, honey bee workers still retain limited reproductive capacity as  
105 adults, which is repressed by pheromone signals released by the queen and her brood (Slessor  
106 et al., 2005). Hence, JH biosynthesis genes are implicated in caste-specific developmental  
107 trajectories in social bees (Bomtorin et al., 2014; Cardoso-Júnior et al., 2017).

108           While transcriptomic analyses of honey bee ovaries have provided insights into  
109 potential gene regulatory networks (Duncan et al., 2020; Lago et al., 2016), only a few  
110 specific genes have actually been functionally characterized thus far. For instance, the  
111 functional knockdown of the DNA methyltransferase 3 by RNA interference (RNAi) resulted  
112 in a queen-like phenotype, mirroring the dietary effects induced by the royal jelly (Kucharski  
113 et al., 2008). Moreover, genes associated with the insulin/insulin-like and target of rapamycin  
114 signaling (IIS/TOR) pathways likely play roles in honey bee caste dimorphism as they link  
115 nutrient-sensitive pathways to downstream regulators of reproduction (de Azevedo and  
116 Hartfelder, 2008; Patel et al., 2007).

117           A candidate gene of particular interest regulating caste dimorphism is the long non-  
118 coding RNA (lncRNA) denominated *long non-coding ovary-1 RNA (lncov1)* (Humann and  
119 Hartfelder, 2011; Humann et al., 2013). lncRNAs, usually defined as ncRNAs longer than  
120 200 bp (Ma et al., 2013), have been hypothetically implicated in the behavioral plasticity  
121 (Glastad et al., 2019; Liu et al., 2019; Yan et al., 2014) and ovary activity (Chen and Shi,  
122 2020; Chen et al., 2017) of social insects. Specifically, *lncov1* is genomically located on  
123 chromosome 11, in an intron of a predicted gene of unknown function, designated  
124 *LOC726407*. Interestingly, the *LOC726407* gene (and thereby, *lncov1*) maps within a  
125 quantitative trait locus (QTL) associated with variation in ovariole number in adult honey bee  
126 workers (Humann et al., 2013; Linksvayer et al., 2009). Importantly, *lncov1* is overexpressed  
127 in the ovaries of worker larvae just as they undergo PCD, while expressed at basal levels in  
128 queen ovaries (Humann and Hartfelder, 2011). Together, this makes *lncov1* a strong  
129 candidate for regulating the divergence in reproductive capacity between honey bee queens  
130 and workers.

131           While functions for lncRNAs has so far only been proposed in neuronal processes of  
132 adult honey bee workers (Kiya et al., 2012; Sawata et al., 2004) and ants (Shields et al.,

133 2018), here we mechanistically and functionally investigate the *in vivo* roles of *Incov1* in  
134 worker sterility of honey bees kept under natural conditions or subjected to endocrinal, social  
135 and dietary treatments that modulate ovary activation.

136

## 137 **RESULTS**

### 138 **The expression of *Incov1* and *LOC726407* are negatively associated across the** 139 **development of honey bee larvae.**

140 To gain insights into the expression dynamics of *Incov1* and its protein coding host  
141 gene *LOC726407*, we determined their transcript levels by quantitative PCR (RT-qPCR) in  
142 four tissues of the fourth larval instar (L4) and six substages of the fifth larval instar (L5). We  
143 found that *Incov1* is higher expressed in the fat body and the ovaries compared to head tissue  
144 and the leg imaginal discs (Fig. 1A). We also provide confirmative evidence for its  
145 expression peak previously reported in the ovaries late feeding-stage fifth instar worker  
146 larvae (L5F3) (Humann et al., 2013). *LOC726407* expression is higher in the head and the leg  
147 imaginal discs compared to the two abdominal tissues (Fig. 1A). This indicates that the  
148 expression of the intronic *Incov1* transcript is specifically regulated and not a by-product of  
149 mRNA processing of its host gene, *LOC726407*. Furthermore, a correlation analysis revealed  
150 a negative association between *Incov1* abundance and *LOC726407* gene expression (Fig. 1B,  
151 two-tailed Spearman's correlation test,  $\rho = -0.768$ ,  $p < 0.0001$ ,  $n = 82$ ).

152

### 153 **The spatial and temporal *Incov1* expression correspond with PCD events in larval** 154 **worker ovaries**

155 Using fluorescence *in situ* hybridization (FISH) we identified the ovary regions where  
156 *Incov1* is expressed (Fig. 1C-H). In fourth instar (L4) worker ovaries, i.e., prior to the onset  
157 of PCD, *Incov1* transcripts are not detectable (Fig. 1C-D). However, in L5F3 worker ovaries,

158 at the peak of *lncov1* expression, the transcripts are visible as clear fluorescence signals,  
159 especially in the central region of the ovarioles (Figs. 1E-F and Fig. S1A,B). At this  
160 developmental stage, strong TUNEL-positive marks indicating PCD have previously been  
161 detected exactly in this central region of the ovarioles (Schmidt-Capella and Hartfelder,  
162 1998). The intracellular localization of *lncov1* transcripts in the L5F3 ovarioles appeared as  
163 speckles and diffused throughout the cytoplasm of the germline cells (Fig. S1A,B). The  
164 cytoplasmic localization of *lncov1* RNA revealed by the FISH assays is corroborated by *in*  
165 *silico* predictions (iLoc-LncRNA software) of its subcellular location.

166 In L5S3 worker ovaries, the FISH-positive *lncov1* fluorescence appeared to be  
167 reduced compared to the L5F3 stage (Fig. 1G-H), consistent with the lower *lncov1* transcript  
168 levels in the L5S3 ovaries (Fig. 1A). Furthermore, the *lncov1* speckles were spread out along  
169 the entire ovariole axis and no longer concentrated in the central region (Fig. 1G-H). This  
170 expression pattern again corresponds with the more widespread TUNEL-positive marks  
171 previously found for this developmental stage (Schmidt-Capella and Hartfelder, 1998). In the  
172 negative control samples prepared with the sense probe no signal was detected (Fig. S1C-H).  
173 These FISH results, not only provide independent support for the temporal dynamics of the  
174 *lncov1* transcript levels obtained from the RT-qPCR assays (Fig. 1A), but also establish that  
175 its expression peak is spatially associated with the onset of PCD in the ovaries of worker  
176 larvae.

177

### 178 ***lncov1* interacts with the cell death-associated Tudor-SN protein**

179 For a deeper understanding of the role of the *lncov1* gene in honey bee development  
180 we identified putative interaction partners by performing pull-down assays followed by  
181 shotgun proteomics (LC-ESI-MS/MS). For this, the full-length *lncov1* RNA was expressed *in*  
182 *vitro*, immobilized on magnetic beads, and then incubated with protein extracts from L5F3

183 worker larvae. Mass spectrometry analyses of the pull-down products identified the following  
184 *Incov1*-interacting proteins: Tudor-SN, with nine hits in the Mascot database to *A. mellifera*  
185 proteins; Elongation factor 1-beta, with three Mascot hits; Elongation factor 1-gamma-like,  
186 also with three Mascot hits; Elongation factor 1-delta-X2, with four Mascot hits; 3-ketoacyl-  
187 CoA thiolase, mitochondrial isoform X2, with five Mascot hits; and 60S acidic ribosomal  
188 protein P1, with one Mascot hit (Table S1).

189         The protein with the highest Mascot scores, Tudor-SN, is a highly promising  
190 candidate to reveal predictive *Incov1*-sterility-associated functions because Tudor-SN is an  
191 evolutionarily-conserved component of the apoptosis degradome in plants and animals,  
192 essential for PCD propagation (Sundström et al., 2009). In addition, the honey bee Tudor-SN  
193 protein is *in silico* predicted to be cytoplasmic (ProtComp v9.0 software), suggesting that the  
194 *Incov1*/Tudor-SN complex may be assembled and functional in the cytoplasm of the ovariole  
195 cells of honey bee worker larvae. Therefore, the interaction of *Incov1* and Tudor-SN protein  
196 provides a plausible functional explanation for the cytoplasmic localization of *Incov1*  
197 observed in the FISH assays. Our downstream functional analyses were, therefore, focused  
198 on this candidate protein.

199

#### 200 ***Tudor-SN* expression coincides with the expression of *Incov1* and is elevated in the** 201 **ovaries of worker larvae undergoing PCD**

202         As Tudor-SN had not previously been implicated in honey bee worker sterility, we  
203 first quantified its expression levels in the ovaries of queen and worker larvae in the critical  
204 larval stages (L4 and L5). The RT-qPCR data not only showed that *Tudor-SN* is expressed in  
205 the larval ovaries of both queens and workers, but also that it has an expression peak in  
206 L5F3-stage worker ovaries (Fig. 1I and Table S2), perfectly coinciding with the *Incov1*  
207 expression peak (Fig. 1A). This temporal correlation for the expression of the two genes



208 provides additional evidence for the physical *Incov1*/Tudor-SN interaction shown through the  
209 pull-down assay.

210

## 211 **The silencing of *Tudor-SN* affects the expression of pro-apoptotic genes and effector** 212 **caspase activity**

213 For direct functional insights into the interaction of *Incov1*/Tudor-SN we performed  
214 RNAi experiments in honey bee larvae. To do so, *Incov1* or *Tudor-SN* double-strand RNAs  
215 (ds-*Incov1* and ds-*Tudor-SN*, respectively) was added to the diet of L5F2-stage worker  
216 larvae, i.e., just prior to the expression peaks of both genes. In the ovaries of ds-*Tudor-SN*-  
217 treated larvae, the expression of *Tudor-SN* was reduced by approximately 50% compared to  
218 untreated larvae or the negative controls treated with ds-*GFP* (Fig. 2A and Table S3). In ds-  
219 *Incov1* treated larvae, however, we were unable to achieve a significant knockdown of the  
220 target gene, despite several attempts and using both *in vivo* and *in vitro* dsRNA treatment  
221 strategies (Fig. S2A-C). In the subsequent experiments we, therefore, focused on the effect of  
222 the *Tudor-SN* knockdown on molecular pathways known to be associated with honey bee  
223 worker sterility.

224 We investigated whether the knockdown of *Tudor-SN* affected the expression of its  
225 interaction partner *Incov1* and of four worker-sterility related genes: *Anarchy* (Oxley et al.,  
226 2008; Ronai et al., 2016a), *Ark* and *Buffy* (Dallacqua and Bitondi, 2014) and the PCD effector  
227 caspase *GB41369* (Ueno et al., 2009). We found that worker larvae treated with ds-*Tudor-SN*  
228 had significantly reduced expression levels of *Incov1* and *Ark* (Fig. 2B,C and Table S3),  
229 while the expression of *Buffy*, *Anarchy* and *GB41369* was unaffected (Fig. 2D-F and Table  
230 S3).

231 Given that the human Tudor-SN ortholog is itself cleaved by the effector caspase  
232 Caspase-3 (Sundström et al., 2009), we next conducted a biochemical assay to investigate

233 whether the knockdown of *Tudor-SN* affected effector caspase activity, as a proxy of PCD in  
234 honey bees (Ronai et al., 2016b, 2017). Larvae fed with ds-*Tudor-SN* had significantly  
235 reduced effector caspase activity compared to control larvae (Fig. 2G and Table S3). In  
236 summary, our results show that the knockdown of *Tudor-SN* downregulated the expression of  
237 two pro-apoptotic transcripts, *Incov1* and *Ark*, and also modulated the activity of an effector  
238 protein of PCD. These results indicate that the *Incov1*/*Tudor-SN* interaction constitutes a  
239 functional module that drives PCD in the ovaries of worker larvae.

240

#### 241 **Juvenile hormone treatment does not significantly affect *Incov1* and *Tudor-SN*** 242 **expression**

243 Since queen larvae have hemolymph JH levels that are approximately 10 times higher  
244 than worker larvae throughout their larval development (Rachinsky et al., 1990), and the fact  
245 that JH inhibits the ovarian PCD (Schmidt-Capella and Hartfelder, 1998), we tested whether  
246 JH might be an upstream negative regulator of the *Incov1*/*Tudor-SN* module. Hence, we  
247 applied synthetic JH-III topically to worker larvae, while controls were treated with acetone  
248 (solvent control), or left untreated. As expected, the expression of *Kruppel-homolog 1* (*Kr-*  
249 *hl*), a primary target of JH in insects (Bellés, 2020), including honey bees (Lago et al., 2016),  
250 was significantly up-regulated in response to the JH-III treatment (Fig. S2D-F and Table S4).  
251 The mean expression level of *Incov1* was lower in the JH-III treated larvae, but differences  
252 were not statistically significant (Fig. S2E and Table S4). The mean expression level of  
253 *Tudor-SN* was higher in the JH-III treated larvae, but again, due to the large between-sample  
254 variation, this result was also statistically not significant (Fig. S2F and Table S4). Although  
255 these expression trends were in the direction expected if JH plays a suppressive role in the  
256 *Incov1*/*Tudor-SN* regulatory module, our analysis does not distinguish whether JH signaling

257 and the *Incov1*/Tudor-SN module are in the same or in parallel pathways that modulate PCD  
258 events in the caste-specific development of honey bee larval ovaries.

259

### 260 **Queen presence and diet modulate *Incov1*/Tudor-SN activity in adult workers**

261 After finding evidence that the *Incov1*/Tudor-SN module acts as a regulator of PCD  
262 activity in the ovaries of honey bee larvae, we next examined whether this module might also  
263 be associated with ovary sterility in adult workers. We particularly investigated whether the  
264 expression of *Incov1* and *Tudor-SN* is affected by environmental cues known to regulate  
265 ovary activation in adult workers (Altaye et al., 2010; Cardoso-Júnior et al., 2021a; Lin and  
266 Winston, 1998; Ronai et al., 2016b), such as the presence or absence of a queen, or a  
267 nutrient-enriched diet.

268 We first mimicked the presence/absence of a queen by housing young adult workers  
269 in cages containing synthetic queen mandibular gland pheromone (QMP). We found that  
270 exposure to QMP led to a significant increase in *Incov1* expression in the ovaries of 4-day-old  
271 adult workers, while *Tudor-SN* expression was decreased (Figure 3A and Table S5).  
272 Furthermore, the expression of these two genes changed according to the age of the adult  
273 workers.

274 Since experiments with caged bees can only partially reflect what happens in a real  
275 colony, we next quantified the levels of *Incov1* and *Tudor-SN* expression in the ovaries of 4-  
276 day-old sister workers of paired queenright or queenless colonies kept under field conditions.  
277 As with the results for the caged bees, we found that *Incov1* expression is significantly higher  
278 in the workers of all three queenright colonies relative to their queenless pair (Figure 3B and  
279 Table S5). The results for *Tudor-SN* expression, however, were significantly higher in one  
280 queenright colony (colony A), and showed no difference for the other two colonies (Figure  
281 3B and Table S5). When the data from all three colonies are pooled, *Tudor-SN* expression is

282 significantly higher in the queenright condition (Fig. 3B and Table S5), in contrast to what is  
283 found for the cage experiment. This effect was not entirely driven by colony A, as the trend  
284 in the other two colonies appeared to be in the same direction. In conclusion, *lncov1* is  
285 overexpressed in response to a queen signal, either in the cage or field colonies; however, we  
286 found an effect of the queen on *Tudor-SN* expression in controlled cage experiments but this  
287 finding is in the opposite direction for the field colony study.

288         Second, we investigated whether the adult workers' diet affects the *lncov1*/Tudor-SN  
289 module. For this we fed newly emerged workers a queen-like diet consisting of highly  
290 nutritious royal jelly (RJ) mixed with honey to induce ovary activation (Cardoso-Júnior et al.,  
291 2021a), or a worker (control) diet, consisting of 50% honey. Workers kept in RJ or control  
292 cages, exposed or not to QMP, were provided pollen (protein source) and water *ab libitum*.

293         In accordance with the hypothesis that *lncov1* suppresses ovary activation in adult  
294 bees, we found that workers fed RJ-rich diet significantly reduced *lncov1* transcription in  
295 their ovaries, while QMP upregulated *lncov1* levels (Fig. 3C and Table S5). Furthermore, the  
296 expression pattern of *lncov1* was exactly opposite to the ovary activation score (Cardoso-  
297 Júnior et al., 2021a), indicating that *lncov1* expression is negatively associated with ovary  
298 activation in adult worker (Fig. S3, Two-tailed Spearman's correlation test,  $\rho = -0.6$ ,  $p <$   
299  $0.0001$ ,  $n = 76$ ). To test for a direct role of *lncov1* in ovary activation in adult workers, we  
300 quantified the *lncov1* expression levels in activated and non-activated ovaries of QMP/RJ  
301 workers as this group had a sufficient number bees with activated ovaries that it could be  
302 analyzed separately. We found that the expression of *lncov1* was significantly lower in the  
303 activated ovaries compared to non-activated ones (Fig. 3C inset and Table S5). On the other  
304 hand, *Tudor-SN* expression is enhanced by the RJ diet but suppressed by QMP (Fig. 3C and  
305 Table S5). Furthermore, *Tudor-SN* expression is higher in activated ovaries compared to non-

306 activated ones (Fig. 3C inset), and positively correlated with the ovary activation score (Two-  
307 tailed Spearman correlation test,  $\rho = 0.31$ ,  $n = 76$ ,  $p = 0.006$ ).

308 Thus, our results indicate that the queen, via her mandibular gland pheromone,  
309 triggers a consistent up-regulation of *lncov1* expression in adult worker bees as a component  
310 of the pathway that suppresses their ovarian activation. In contrast, the RJ-enriched diet  
311 attenuated the inhibitory effect of QMP on the ovarian *Tudor-SN* expression level (Fig. 3A,C)  
312 and, in a more general sense, ovary activation (Cardoso-Júnior et al., 2021a).

### 313 **Independent validations of *lncov1*'s roles in honey bee reproduction**

314 To independently validate our findings that all point towards a central role of *lncov1*  
315 in honey bee worker sterility, we investigated whether and to what degree *lncov1* and *Tudor-*  
316 *SN* appear as differentially expressed in publicly available RNA-Seq datasets (Chen and Shi,  
317 2020; Chen et al., 2017; Duncan et al., 2020). These transcriptomes were downloaded and  
318 reanalyzed with a focus on the expression of three genes of interest, *lncov1*, *Tudor-SN*,  
319 *LOC726407*. *Gadph* (GB50902) expression levels were checked as endogenous control for  
320 between-sample variability. These transcriptomes permitted us to independently assess the  
321 expression of these genes in activated ovaries from queenless workers and queens in  
322 comparison to the inactivated ovaries of queenright workers.

323 For the RNA-seq libraries generated by Duncan and colleagues (Duncan et al., 2020),  
324 *lncov1* is overexpressed in the inactivated ovaries of queenright workers, while reduced  
325 transcript levels is found in the ovaries of queenless workers and queens (Fig. 4A). Contrary  
326 to the clear pattern for *lncov1*, the expression of *Tudor-SN* does not differ between activated  
327 and inactive ovaries (Fig. 4B), supporting our own results for colony-reared bees (Fig. 3B).  
328 The expression of *LOC726407* followed the same patterns of *lncov1* (Fig. S4), indicating that  
329 the negative association between *lncov1* and its host gene *LOC726407* (Fig. 1B) might be  
330 restricted to larval development and/or is more evident in other tissues of adult bees. As there

331 was no difference with respect to *Gapdh* expression (Fig. S4), the differences observed for  
332 the *lncov1* and *LOC726407* transcripts likely reflect real biological differences between the  
333 two ovary types and are not due to technical issues or between-sample variability.

334 We also investigated the expression of the same four genes in the ovarian  
335 transcriptomes of workers and adult queens recently published by the same research group  
336 (Chen and Shi, 2020; Chen et al., 2017). *lncov1* is overexpressed in the ovaries of adult  
337 queenright workers, while moderate to low expression levels are found in the ovaries of  
338 virgin queens and mated queens, respectively (Fig. 4C). Ovarian expression of *Tudor-SN* is  
339 high in workers and shows medium-low expression levels in the ovaries of queens (Fig. 4D).  
340 Interestingly, *Tudor-SN* expression is increased in all three samples of queens that had been  
341 allowed to re-start oviposition when compared to other mated queens (Fig. 4D). This pattern  
342 in *Tudor-SN* expression was not observed for the other genes assessed (Fig. 4C and S6).  
343 Taken together, these results provide compelling independent evidences for the hypothesis  
344 that the *lncov1*/*Tudor-SN* regulatory module is indeed key to the flexible modulation of the  
345 reproductive activity of honey bee queens and workers.

346 Since this analysis revealed that *lncov1*, as shown by the logarithmic scale in Fig.  
347 4A,C, is overexpressed in the ovaries of queenright workers, we determined whether *lncov1*  
348 would appear in the list of differentially expressed genes considering whole ovary  
349 transcriptome. Hence, we computationally included the *lncov1* sequence as a gene ID to the  
350 list of transcripts generated by the honey bee genome, and after FDR corrections, we found  
351 that *lncov1* is listed within the differentially expressed transcripts in all the scenarios tested  
352 (Fig. S5). Together with our RT-qPCR data, these *in-silico* analyses are independently  
353 generated evidences in favor of the hypothesis that elevated levels of *lncov1* in the ovaries of  
354 queenright workers are an intrinsic signature of worker sterility.

355

### 356 ***lncov1* is an evolutionarily conserved lncRNA in Apidae**

357       Next, we investigated whether and to what extent *lncov1/Tudor-SN* may be  
358 evolutionarily conserved in the genomes of bees and hymenopterans in general. Using the *A.*  
359 *mellifera lncov1* sequence as query for blastn searches for species in the Hymenopteran  
360 Genome Database (Elsik et al., 2018), we found that *A. mellifera lncov1* has a nearly full-  
361 length alignment (E-value 0.00) with sequences of the three other honey bee species (genus  
362 *Apis*): *A. cerana*, *A. dorsata*, and *A. florea* (Fig. 4E and Table S8). High levels of sequence  
363 conservation is also seen for the other three branches of corbiculate bees, represented by the  
364 orchid bee *Eufriesea mexicana* (solitary to facultative eusocial), the stingless bee *Melipona*  
365 *quadrifasciata* (highly eusocial), and five bumble bee species (genus *Bombus*; primitively  
366 eusocial). In these non-*Apis* corbiculates, as well as in the anthophorid *Habropoda laboriosa*,  
367 we found two highly conserved fragments of the *lncov1*-like gene, one of 290 to 298 bp  
368 corresponding to the 5' end of *A. mellifera lncov1* and a shorter one of 121 to 190 bp fragment  
369 with significant similarity to the 3' end of *A. mellifera lncov1* (Fig. 4E and Table S8). In  
370 *Ceratina calcarata*, a member of the family Apidae, tribe Ceratini, two structural elements of  
371 *A. mellifera lncov1* were also identified, but with much lower levels of similarity (Table S8).  
372 In the genomes of five solitary bees, all belonging to the families Halictidae and  
373 Megachilidae, sequence conservation was restricted to the 281 to 297 bp fragment of the  
374 5' end of *A. mellifera lncov1*. Outside the bees (Anthophila), only a small fragment of 51–53  
375 bp in length located at the end of this conserved 5' region showed significant similarity ( $e^{-9}$  to  
376  $e^{-6}$ ) with honey bee *lncov1* (Fig. 4E and Table S8). This fragment was found in the genomes  
377 of ants (Formicidae) and parasitic wasps (Braconidae). Thus, we found remarkably high  
378 sequence conservation for honey bee *lncov1* in the other species of the genus *Apis*.  
379 Considerable sequence conservation was also noted in the other social corbiculate bees and,  
380 gradually decreasing in the other bee families whose females generally have a solitary

381 lifestyle. This finding provides additional support for the hypothesis that *Incov1* played a  
382 critical role in the social evolution of bees.

383

## 384 **DISCUSSION**

385 We functionally characterized the first lncRNA implicated in the evolution of highly  
386 eusocial insects, the *Incov1*. Its expression patterns in the ovaries of honey bee larvae,  
387 together with its responsiveness to environmental cues that modulate ovary activity in adults,  
388 strongly suggest *Incov1* is associated with the ovarian PCD events that establish and maintain  
389 the worker ovaries in a quiescent status. The *Incov1*-interaction partner, the Tudor-SN  
390 protein, is an essential component of the PCD degradome from animals to plants serving as a  
391 substrate for effector caspase cleavage during apoptosis propagation (Sundström et al., 2009).  
392 Moreover, Tudor-SN wild-type functions are essential for cell viability as it participates in  
393 microRNA biogenesis mechanism being part of the RNA-induced silencing complex (Caudy  
394 et al., 2003). Based on these findings, we propose a model where *Incov1* is a key component  
395 of the molecular machinery that drives honey bee worker sterility through its interaction with  
396 Tudor-SN (Fig. 5), a regulatory mechanism likely generalized to other social bee species.

397 We suggest that Tudor-SN has a Janus function that depends on the presence or  
398 absence of *Incov1*. In the presence of *Incov1*, as is the case in larval and adult queenright  
399 worker ovaries, Tudor-SN is required to propagate PCD events, whereas in the absence of  
400 *Incov1* (queen ovaries and ovaries of queenless workers), Tudor-SN likely promotes cell  
401 viability. Supporting this model, the Tudor-SN protein was first characterized in *D.*  
402 *melanogaster*, where a loss-of-function mutation in the *Tudor-SN* sequence caused sterility  
403 (Boswell and Mahowald, 1985), and the RNAi-mediated knockdown of a Tudor-SN protein  
404 family member in the oriental fruit fly *Bactrocera dorsalis* caused a disruption in ovary  
405 development (Xie et al., 2019). Moreover, we found that *Incov1* and *Tudor-SN* have a precise



406 temporal overlap in their expression, suggesting a shared pathway for transcriptional  
407 regulation. We confirmed this via an RNAi experiment, where the knockdown of *Tudor-SN*  
408 led to a significant reduction in the expression of *IncovI*. Unfortunately, we were not able to  
409 test for a reciprocal effect, as we did not obtain a significant RNAi-mediated knockdown  
410 when targeting *IncovI*. Nonetheless, Tudor-SN positively regulates the expression of the pro-  
411 apoptotic gene *Ark*, which has previously been implicated in PCD in the ovaries of larval  
412 honey bees (Dallacqua and Bitondi, 2014). More importantly, the knockdown of *Tudor-SN*  
413 lowers the activity of effector caspases at the protein level, indicating that Tudor-SN is itself  
414 a substrate of caspase activity in honey bees (this study) as well as in other metazoans  
415 (Sundström et al., 2009). Furthermore, our results also indicate that Tudor-SN functions in a  
416 PCD pathway that does not involve the anti-apoptotic gene *Buffy*, which is thought to protect  
417 the larval ovaries from undergoing PCD (Dallacqua and Bitondi, 2014), or the *Anarchy* gene,  
418 which regulates ovary activation in adult honey bee workers (Ronai et al., 2016a). Together  
419 with the important evidence that the abortive ovaries of worker larvae express higher levels  
420 of *Tudor-SN* than the well-developed ovaries of queen larvae, these results indicates that  
421 during the evolution of a worker caste Tudor-SN functions in cell-viability has been co-opted  
422 toward its evolutionary-conserved PCD-related roles.

423 In adult workers then, the *IncovI*/Tudor-SN complex prevents workers from  
424 activating their ovaries in the presence of a queen signal, and thus plays key roles in  
425 preventing eventual reproductive social conflicts in the colony. Potentially, this PCD pathway  
426 acts through the direct activation of *Ark* and effector caspase activity, just as in the larval  
427 ovaries, or through interactions with other worker sterility genes such as *Anarchy* (Ronai et  
428 al., 2016a, 2017) and Notch signaling (Duncan et al., 2016). These downstream effects are  
429 especially interesting in view of the contrasting results between the cage and the colony  
430 experiments for *Tudor-SN* expression. It is plausible that other social cues, such as brood

431 pheromones (Slessor et al., 2005; Traynor et al., 2014) might have a role counteracting the  
432 effects of the QMP on Tudor-SN expression in the ovaries of workers. For instance,  
433 increased levels of Tudor-SN in colony-reared workers is actually predicted to result in a  
434 stronger activation of the *lncov1*/Tudor-SN PCD-associated pathway in queenright social  
435 context because *lncov1* transcription is active. Thus, a plausible hypothesis to these apparently  
436 contrasting results might be that a queen signal unequivocally ensures *lncov1* overexpression  
437 while her brood evolved fine-tuning the activation of the *lncov1*/Tudor-SN regulatory  
438 complex. We propose that worker ovarian cell death is effectively achieved primarily through  
439 overexpressing *lncov1* in response to the presence of a queen, and that this epigenetic factor  
440 is sufficient for interrupting Tudor-SN function regardless of transitory changes in *Tudor-SN*  
441 expression levels in response to brood or queen pheromones. These results indicate that  
442 *lncov1* and its interaction partner Tudor-SN constitute a molecular signature of worker  
443 sterility that operates during the entire life cycle of honey bees favoring colony cohesion.

444         Supportive of a general role of *lncov1*/Tudor-SN operating in the reproduction of both  
445 castes, we found changes in the expression of Tudor-SN in the ovaries of honey bee queens  
446 when they need to re-start oviposition, a process naturally faced by queens after swarming.  
447 Recently, we showed that *lncov1* and *Tudor-SN* expressions are both associated with a  
448 reduction in reproductive capacity of adult queens as a result of caging (Aamidor et al.,  
449 2022). Together with the findings that *Tudor-SN* is required in the ovaries of queens, both at  
450 larval and adult stages, these evidences suggest that the Tudor-SN protein might plays pivotal  
451 roles in the reproductive plasticity of queens. To the best of our knowledge, the *lncov1*,  
452 through its association with Tudor-SN, is the first lncRNA functionally implicated in the  
453 reproductive division of labor in social insects.

454         A still-open question concerns the function of *lncov1*'s host gene, *LOC726407*. The  
455 negative correlation that we found in larvae tissues for the expression of the lncRNA and

456 *LOC726407* suggests that *lncov1* may actually be a negative regulator in *cis* for *LOC726407*.  
457 The presence of a CUB (C1r/C1s, Uegf, Bmp1) domain in the amino acid sequence of the  
458 *LOC726407* protein is interesting because this domain is present almost exclusively in  
459 extracellular and plasma membrane-associated proteins that are involved in a wide range of  
460 biological functions, including developmental patterning, cell signaling, and fertilization  
461 (Blanc et al., 2007). Therefore, it is possible that the low ovarian expression levels of  
462 *LOC726407* in workers can be important for reducing their reproductive capacity. Such an  
463 inhibitory function of *lncov1* on *LOC726407* expression, however, does not seem to be a  
464 general rule, as evidenced by the re-analyses of the transcriptomes of adult honey bees and  
465 the positive correlation during brain morphogenesis program of pupal honey bee queens and  
466 workers (de Paula Junior et al., 2020). Thus, it is possible that *lncov1* might have pleiotropic  
467 functions beyond reproduction, which will likely depend on its interacting partners, time-  
468 dependent and and tissue-specific expression profile.

469 Our finding of the high sequence conservation of *lncov1* in the honey bees (*Apis* genus) is  
470 remarkable. Despite knowing that lncRNAs are much less conserved than protein coding  
471 genes (Hezroni et al., 2015; Lopez-Ezquerria et al., 2017), especially intronic lncRNAs  
472 (Chodroff et al., 2010), sequence similarity of *lncov1* across the genus *Apis* is actually higher  
473 than for many protein coding genes. Furthermore, we suggest that *lncov1* is a lineage-specific  
474 lncRNA gene that likely originated during the early evolution of bees (*Anthophila*) and  
475 became particularly important in the corbiculate bees, a monophyletic clade that originated  
476 approximately 80 million years ago (Branstetter et al., 2017; Cardinal and Danforth, 2011).  
477 The corbiculate bees comprise the facultatively eusocial orchid bees, the primitively eusocial  
478 bumble bees, and the two highly eusocial bees, the honey bees (*Apini*) and the stingless bees  
479 (*Meliponini*). Recently, *Tudor-SN* was found to be under positive selection in the *Apis* branch  
480 when compared to *Bombus* (Fouks et al., 2021). The high sequence conservation of *lncov1*

481 may, thus, have been important for establishing its functional association with the Tudor-SN  
482 protein as a regulatory module in the social evolution of bees. In the early stages of sociality,  
483 the *lncov1*/Tudor-SN module may have been involved in promoting the reproductive  
484 dominance of mothers over their daughters via pheromonal signals and diet (Oi et al., 2015;  
485 Ronai et al., 2016c). In the highly eusocial honey bees, however, the *lncov1*/Tudor-SN  
486 module may then have been co-opted to promote extensive PCD in the ovaries of worker-  
487 destined larvae, defining the reduced number of ovarioles during larval development and  
488 ensuring ovary inactivity during adult life cycle. The *lncov1*/Tudor-SN module is, thus, likely  
489 a key factor in the evolution of the extreme dimorphism in reproductive capacity of queens  
490 and workers that is a hallmark for all the species comprising the genus *Apis*.

491 The discovery of a novel, functional and active epigenetic pathway that consists of a  
492 socially-responsive lncRNA and effector proteins provides insights on the molecular  
493 mechanisms underlying the evolution of eusociality in insects. If appreciated under the light  
494 of the mammalian epigenetic literature, the findings reported here on the *lncov1*/Tudor-SN  
495 module in an invertebrate species are reminiscent of the discovery of Xist, one of the first  
496 lncRNAs to be functionally characterized in the early 1990s that is responsible for the X-  
497 chromosome inactivation in female mammals (Loda and Heard, 2019). Recently, another  
498 “*social*” lncRNA was identified in rodents (Ma et al., 2020), which together with *lncov1*,  
499 represents a strong argument that this class of ncRNAs might be of major importance to  
500 sociobiology and evolutionary biology. The sophisticated cross-talk between an epigenetic  
501 driver of worker sterility (*lncov1*) and its effector proteins further highlights social insects as  
502 valuable organismic models to gain evolutionary insights into the epigenetic mechanisms  
503 required to express some of the most exuberant forms of polyphenism found in nature, such  
504 as the female castes of social insects.

505

## 506 ACKNOWLEDGMENTS

507 The authors thank Carlos Couto for his help in the cloning experiments. This work  
508 was supported by grants from Fundação de Amparo à Pesquisa do Estado de São Paulo  
509 (FAPESP grants 2016/15881-0, 2017/09269-3 and 2020/08524-2 to CAM, 2011/15810-2 and  
510 2014/05757-5 to GJT, 2016/16622-9 to DCL and 2017/09128-0 to KH), the Coordenação de  
511 Aperfeiçoamento de Pessoal de Nível Superior - Brasil (CAPES) - Finance Code 001, and the  
512 Australian Research Council (DP180101696 to BPO and Amro Zayed).

513

## 514 DECLARATION OF INTERESTS

515 The authors declare no competing interests.

516

## 517 FIGURE LEGENDS

518

519 **Figure 1.** Transcriptional dynamics of *Incov1*, *LOC726407*, and *Tudor-SN* genes in the larval  
520 ovaries of honey bees. **A.** Temporal dynamics of *Incov1* (upper graph) and *LOC726407*  
521 (bottom graph) expression in larval workers. Four tissues were investigated: ovaries (blue),  
522 head (red), fat body (orange), and leg imaginal discs (black), in seven larval developmental  
523 stages: fourth larval stage (L4); and fifth instar feeding and spinning stage larvae (L5F1 –  
524 L5S3) [the *Incov1* expression data shown in a for the ovaries is from (Humann et al., 2013)];  
525 shown are the means  $\pm$  SEM. **B.** *LOC726407* expression plotted against *Incov1* expression  
526 across the samples shown in **A**; the black line indicates the trend (Two-tailed Spearman's  
527 rank correlation test,  $\rho = -0.768$ ,  $p < 0.0001$ ,  $n = 82$ ). **C-H.** Fluorescence *in situ* hybridization  
528 (FISH) of *Incov1* transcripts in the ovaries of larval honey bee workers. **C-D.** L4 stage. **E-F.**  
529 L5F3 stage. **G-H.** L5S3 stage. The FISH images on the left (**C, E, G**) show the FISH signal  
530 for *Incov1* in green, those on the right (**D, F, H**) show the overlay of the *Incov1* fluorescence  
531 (green) in relation to the nuclear stain DAPI (blue); white arrows indicate *Incov1* speckles  
532 and T indicates autofluorescent tracheoles present in the ovaries. Scale bars 30  $\mu$ m. **I.**  
533 Temporal dynamics of *Tudor-SN* expression in the ovaries of queen (green) and worker (red)  
534 larvae. Shown are the means  $\pm$  SEM (Two-way ANOVA,  $*p < 0.01$ , Table S2). See Table S6  
535 for details of sample size.

536

537 **Figure 2.** Effect of the RNAi-mediated knockdown of *Tudor-SN* function in the ovaries of  
538 worker larvae. Treatment groups: ds-*Tudor-SN*, negative control ds-*GFP*, and untreated  
539 larvae. **A.** Knockdown efficiency of ds-*Tudor-SN*. **B.** Relative expression of *Incov1*, *Ark* (**C**),  
540 *Buffy* (**D**), *Anarchy* (**E**) and *GB41369* (**F**), a putative effector caspase coding gene. **G.**  
541 Effector caspase activity, relative light units (RLU) were normalized to the protein  
542 concentration of the sample. Bars represent means  $\pm$  SEM,  $*p < 0.05$  and “n.s” indicates  $p >$   
543 0.05. See Table S6 for details of sample size.

544

545 **Figure 3.** Modulation of the expression of *Incov1* and *Tudor-SN* in the ovaries of adult  
546 workers by the presence of a queen and diet. **A.** 1- and 4-day-old caged workers exposed  
547 (QMP<sup>+</sup>, blue bars) or not exposed (QMP<sup>-</sup>, red bars) to a strip of synthetic queen mandibular  
548 pheromone (QMP). Workers collected before treatment (Day 0) were used to determine the  
549 expression baseline. Shown are means of relative expression  $\pm$  SEM for *Incov1* (upper graph)  
550 and *Tudor-SN* (bottom graph),  $***p < 0.001$ . **B.** 4-day-old workers kept in queenright (QR,

551 blue bars) or queenless (QL, red bars) field colonies. Shown are means of relative expression  
552  $\pm$  SEM for *Incov1* (upper graph) and *Tudor-SN* (bottom graph),  $*p < 0.05$ ,  $***p < 0.001$ ,  
553  $****p < 0.0001$ . **C.** Combined effects of diet and social environment on *Incov1* (upper graph)  
554 and *Tudor-SN* (bottom graph) expression. Workers were fed a control diet (full bars) or a  
555 royal-jelly-rich diet (striped bars) for seven days, while they were at the same time exposed  
556 (QMP<sup>+</sup>, blue bars) or not to synthetic QMP (QMP<sup>-</sup>, red bars). For the QMP<sup>+</sup>/royal jelly bees,  
557 the expression of *Incov1* and *Tudor-SN* were evaluated separately for workers with non-  
558 activated (NAO) and activated ovaries (AO) (insets: Student's t-test,  $**p < 0.01$ ,  $***p <$   
559  $0.001$ ). Bars represent the means  $\pm$  SEM; different letters indicate a statistical difference at  $p$   
560  $< 0.05$  for GLMM tests. See Table S6 for details of sample size.

561

562 **Figure 4.** Alignments of the *A. mellifera Incov1* gene in the genomes of other social insects,  
563 and quantification of *Incov1* and *Tudor-SN* transcripts in published RNA-seq datasets. **A.**  
564 Estimated read counts for *Incov1* and *Tudor-SN* (**B**) transcripts in the ovary of queenright  
565 workers (blue), queenless workers (red) and queen (green) found in the RNA-seq libraries  
566 published by Duncan et al., 2020. Boxplots represent the intern quartiles of 1000x bootstrap  
567 independent read counts. **C.** Estimated read counts for *Incov1* and *Tudor-SN* (**D**) transcripts  
568 in the ovary of queenright workers (blue), virgin queen (light green), egg-laying queens  
569 (green), caged queens ("egg-laying inhibited queen" - yellow) or caged-released queens  
570 ("egg-laying recovered queen" - orange) found in the RNA-seq libraries published in the  
571 "Chen and Shi, 2020" and "Chen et al., 2017" studies. Boxplots represent the inner quartiles  
572 after 1000x independent bootstrap read counts. **E.** *Incov1* blast against the genomes deposited  
573 in HymenopteraMine. Except for *F. arianus*, which is a braconid wasp, all others are bees.  
574 The grey scale level of the bars indicates the degree of similarity with *A. mellifera Incov1*.  
575 Figure obtained from HymenopteraMine. For details on sequence IDs and alignment scores,  
576 see Table S8.

577

578 **Figure 5.** Model of the *Incov1*/Tudor-SN regulatory mechanisms triggering PCD that  
579 promote worker sterility in honey bees. Left panel (pink): As a result of differential feeding  
580 regimes (i.e., royal jelly vs. worker jelly), worker larvae express high levels of *Incov1* and  
581 *Tudor-SN* in their ovaries. In contrast, the ovaries of queen larvae express basal levels of  
582 *Incov1* (Humann and Hartfelder, 2011 and Peruzzollo et al. unpublished results), while retain  
583 moderate levels of *Tudor-SN* expression. In the absence of *Incov1*, Tudor-SN protein is not  
584 degraded in the ovaries of queen larvae and can act in the RNA-induced silencing complex.  
585 In contrast, when the *Incov1*/Tudor-SN regulatory module is assembled in the ovaries of  
586 worker larvae, it likely triggers the degradation of Tudor-SN by caspase effector proteins,  
587 thus propagating apoptosis. Right panel (blue): In adult honey bee worker ovaries, *Incov1*  
588 is overexpressed in response to queen signals and a worker-like poor nutritious diet. Hence,  
589 high levels of *Incov1* compromise Tudor-SN functions, resulting in inactive ovaries.  
590 However, when a colony lacks a queen, or when a highly nutritious queen-like diet is  
591 provided, the workers' ovaries can become activated decreasing *Incov1* and increasing  
592 *Tudor-SN* expressions. This model emphasizes the effect of *Incov1* flexibly adjusting ovariole  
593 status between death and viability, a process that operates throughout honey bee life cycle.

594

595

596

597

598

599

600



601  
602  
603  
604  
605  
606  
607  
608  
609  
610  
611  
612  
613  
614  
615  
616

### 617 SUPPLEMENTARY FIGURE LEGENDS

618  
619  
620  
621  
622  
623  
624  
625  
626  
627

**Figure S1.** Fluorescence *in situ* hybridization of *lncov1* transcripts in the ovaries of larval workers. **A-B.** Higher magnification of L5F3 worker ovaries showing the cytoplasmic *lncov1* localization as speckles. White arrows indicate *lncov1* speckles (green) and T labels autofluorescent tracheoles present in the ovaries. Nuclei were stained with DAPI (blue). Scale bars 15  $\mu\text{m}$ . **C-H.** Control experiment for the FISH assays using the sense probe for *lncov1* transcripts. The sense probe (control) did not hybridize to *lncov1* transcripts in the ovaries of L4 worker larvae (**C, D**) and neither to those in ovaries of L5F3 (**E, F**), or L5S3 5F3 worker larvae (**G, H**). T marks autofluorescent tracheoles present in the ovaries. Scale bars 50  $\mu\text{m}$ .

628  
629  
630  
631  
632  
633  
634  
635  
636  
637

**Figure S2.** *In vivo* and *in vitro* RNA interference experiments of *lncov1* in the ovaries of honey bee worker larvae and Juvenile hormone (JH) treatment. **A.** Relative expression of *lncov1* in workers fed double-stranded RNA of *lncov1* (ds-*lncov1*) or *GFP* (ds-*GFP*), or left untreated. **B.** Relative expression of *lncov1* in ovaries cultured *in vitro* in the presence of *lncov1* double-strand RNA (1  $\mu\text{g}$ , 0.1  $\mu\text{g}$ , or 0.01  $\mu\text{g}$ ), ds-*GFP* (1  $\mu\text{g}$ ), or left untreated. For all graphs, bars represent relative expression  $\pm$  SEM ( $p > 0.05$ ). **D.** The relative expression of *Krüppel-homolog 1* (*Kr-h1*), a primary target of the JH response, *lncov1* (**E**) and *Tudor-SN* (**F**) was quantified by RT-qPCR in response to JH-III treatment, acetone (solvent) or left untreated (\* indicates statistical significance at  $p < 0.05$ ). For sample size see Table S6.

638  
639  
640  
641  
642  
643  
644

**Figure S3.** Correlation analysis between the ovary activation score reported in (Cardoso-Júnior et al., 2021a) and the gene expression of *lncov1* (left) and *Tudor-SN* (right). The ovary score of individual samples (gray dots) was determined by averaging the ovary score of all four ovary pairs that compose each sample. The black dashed lines represent the respective trend. Statistical information for two-tailed Spearman's correlation tests: *lncov1*  $\rho = -0.601$ ,  $p < 0.0001$ ,  $n = 76$ ; *Tudor-SN*  $\rho = 0.312$ ,  $p = 0.006$ ,  $n = 76$ .

645  
646  
647  
648  
649  
650

**Figure S4.** Ovarian expression of *LOC726407* and *Gapdh* transcripts in RNAseq libraries published in (Chen and Shi, 2020; Chen et al., 2017; Duncan et al., 2020). **(A)** Normalized estimated read counts for *LOC726407* and *Gapdh* **(B)** transcripts in the transcriptomes published in the (Duncan et al., 2020) study. Groups analyzed: queenright workers (blue), queenless workers (red), and queens (green). Boxplots represent the inner quartiles of 1000x

651 bootstrap independent read counts. (C) Normalized estimated read counts for *LOC726407*  
652 and *Gapdh* (D) transcripts in the transcriptomes published in the (Chen and Shi, 2020; Chen  
653 et al., 2017) studies. Groups analyzed: queenright workers (blue), virgin queens (light green),  
654 egg-laying queens (green), egg-laying inhibited queens (yellow), egg-laying recovered  
655 queens (orange).

656

657 **Figure S5.** Transcriptomic analyses contrasting the ovarian expression of queenright workers  
658 between queenless workers and queens. (A) Differentially expressed genes from (Duncan et  
659 al., 2020) study are reported in gray dots after FDR correction (adjusted  $p < 0.05$ ,  $\log_2$ fold  
660 change  $> 0.5$ ), while red dots represent not significantly differentially expressed genes.  
661 Groups being pair-wise compared are reported inside volcano plots (e.g., left side represents  
662 upregulated genes in queenright workers, while right side represent genes upregulated in the  
663 contrasted group). (B) Same as in A, but comparing the ovarian expression of queens and  
664 workers from (Chen and Shi, 2020; Chen et al., 2017) studies. Groups were: Queenright  
665 worker (blue), Virgin queens (light green), Egg-laying queens (“normal queens”, green),  
666 Egg-laying inhibited queens (“caged queens”, yellow), Egg-laying recovered queens (“cage  
667 released queens”, orange).

## 668 MATERIAL AND METHODS

669

### 670 Animals and ethics statement

671 Experiments with honey bee larvae were conducted in Brazil between 2011 to 2017, using  
672 Africanized *Apis mellifera* hybrids. Worker larvae were collected directly from brood combs  
673 kept in the apiary of the Department of Genetics of the University of São Paulo, Ribeirão  
674 Preto, Brazil. All the tissues used in this work were dissected from fourth (L4) and/or fifth  
675 (L5) instar larvae staged according to (Rachinsky et al., 1990). The fifth larval instar is  
676 subdivided into six substages, these being the F1, F2 and F3 stages when larvae are still  
677 feeding, and the S1, S2 and S3 stages, when they have stopped feeding and prepare for  
678 metamorphosis.

679 Experiments with adult honey bees were conducted in Australia between 2017 and  
680 2019, using *A. mellifera ligustica* hives maintained in the apiary of the University of Sydney.  
681 Newly-emerged honey bee workers were obtained by keeping sealed brood frames in an  
682 incubator at 34.5 °C overnight. For all experiments with adults, each sample consisted of a  
683 pool of four pairs of non-activated ovaries, or a single pair of activated ovaries (see Table S6  
684 for sample size details).



685 Experiments were conducted to reduce animal pain, however, insects, including  
686 honey bees, are not subjected to ethical committee approval.

687

### 688 **Gene expression quantification in honey bee larvae**

689 RNA from larvae was extracted from four tissues (ovaries, head, fat body and leg  
690 imaginal discs) using TRIzol reagent (Thermo Fisher Scientific, Waltham, MA) following the  
691 manufacturer's protocol, followed by treatment with 0.1 U RNase-free DNase I (Thermo  
692 Fisher Scientific, Waltham, MA); see Table S6 for details on sample sizes. RNA quality and  
693 quantity were assessed by spectrometry in a Nanovue system (GE Healthcare, Chicago, IL).  
694 First strand cDNA was produced using 1 µg of RNA, with oligo(dT) primers and the  
695 SuperScript™ II Kit (Thermo Fisher Scientific, Waltham, MA), following the manufacturer's  
696 protocol.

697 Relative expression was determined for the following genes: *Incov1*, *Tudor-SN*,  
698 *LOC726407*, *Anarchy*, *Buffy*, *Ark*, *Krüppel homolog-1* and *GB41369*. Quantitative RT-PCR  
699 (RT-qPCR) analyses were set up using 1 µL of cDNA (diluted 1:10), 7 µL of Power SYBR  
700 PCR Green Master Mix (Thermo Fisher Scientific, Waltham, MA), 5 pmol of each primer to  
701 a final volume of 14 µL. Reactions were run in triplicate on a Real-Time PCR StepOne Plus  
702 system (Life Technologies, Carlsbad, CA) under the following conditions: 50 °C for 2 min,  
703 95 °C for 10 min, 40 cycles of 95 °C for 15 s, and 60 °C for 1 min, followed by melting curve  
704 analysis to confirm product specificity. Target gene expression was normalized against *Rp49*  
705 (also named *Rpl32*) and *Actin*, which have both been validated as suitable endogenous  
706 control genes in honey bee RT-qPCR assays (Lourenço et al., 2008).

707 For each developmental stage and tissue at least three biological replicates were run  
708 (see Table S6). Relative expression was assessed via the  $2^{-\Delta\Delta C_t}$  method in both larval and  
709 adult samples (see below). Primer sequences are listed in Table S7.

710

711 **Expression of *Incov1* and *Tudor-SN* in the ovaries of adult honey bee workers in colonies**  
712 **and cage experiments**

713 The ovaries of adult bees were first macerated in TRIzol reagent (Thermo Fisher  
714 Scientific, Waltham, MA), and RNA was then extracted using the Direct-zol RNA MiniPrep  
715 Kit (Zymo Research, Irvine, CA). RNA concentrations were determined with a Qubit 2.0  
716 fluorometer (Invitrogen). cDNA was synthesized from 115 ng of RNA using a SuperScript  
717 III Reverse Transcriptase Kit (Thermo Fisher Scientific, Waltham, MA) with oligo(dT)  
718 primer. The cDNAs were diluted to 2 ng/μL with ultrapure water, and RT-qPCR assays were  
719 set up with 2.5 μL SsoAdvanced Universal SYBR Green Supermix (BioRad, Hercules, CA),  
720 1.25 pmol of each primer, 1 μL of diluted cDNA (2 ng), in a total volume of 5 μL. The  
721 assays were performed in a CFX384 Real-Time System (Bio-Rad). Three technical replicates  
722 were run per sample. RT-qPCR cycle conditions were as follows: 95 °C for 10 min, 40 cycles  
723 of 95 °C for 10 s, 60 °C for 10 s, and 72 °C for 15 s, followed by a melting curve analysis.  
724 The expression of *Incov1* and *Tudor-SN* was normalized to two reference genes (*Rpl32* and  
725 *eflα*) (Lourenço et al., 2008). The expression of the two reference genes was stable  
726 according to BestKeeper software (Pfaffl et al., 2004). *Actin* was not used as an endogenous  
727 control gene in the experiments with adult bees because its expression was affected by the  
728 treatments.

729 To investigate whether synthetic queen mandibular pheromone (QMP) affects *Incov1*  
730 and/or *Tudor-SN* expression, newly-emerged workers from four source colonies headed by  
731 naturally-mated queens were housed in cages (n = 8 cages, 4 QMP<sup>+</sup> and 4 QMP<sup>-</sup>, 150 bees per  
732 cage) for four days at 34 °C [see (Cardoso-Júnior et al., 2020) for further details]. QMP<sup>+</sup>  
733 cages contained a 0.5 queen equivalent released per day from a QMP strip (Phero Tech Inc.,  
734 Canada), which is an effective queen mimic in cage experiments with young workers

735 (Cardoso-Júnior et al., 2020, 2021a). QMP cages contained no QMP strip. Pollen, honey and  
736 water were provided *ad libitum*. Food was replenished when necessary. Workers collected on  
737 Day 0 (directly from the brood comb), Day 1, and Day 4 were immediately put on dry ice to  
738 determine the basal expression (Day 0), the short-term response (Day 1), and the more long-  
739 term response (Day 4) to the QMP treatment. The ovaries were then dissected and gene  
740 expression was determined as described above with eight biological replicates sampled per  
741 colony, time point, and treatment (Table S6). One sample from colony B2QR Day 4 (Table  
742 S6) was removed from the RT-qPCR analyses because of its basal expression levels of both  
743 *lncov1* and *Tudor-SN*.

744 To quantify the expression of *lncov1* and *Tudor-SN* in queenright and queenless field  
745 colonies, we used cDNA libraries prepared for our prior study (Cardoso-Júnior et al., 2021b).  
746 Briefly, three host colonies and located at a remote Apiary at Crommelin Research station  
747 100 km north of Sydney were split into queenright (QR) and queenless (QL) units. On the  
748 same day, brood frames from the three source colonies were placed in an incubator to obtain  
749 newly-emerged workers that were paint marked according to source colony. Source colonies  
750 were headed by single-drone inseminated queens, as previously described in (Cardoso-Júnior  
751 et al., 2021b). The QR and QL units were transferred to the apiary of University of Sydney  
752 and the newly-emerged, paint-marked workers (n = 400 per colony, 200 QR and 200 QL)  
753 were added to their respective colony pairs. After four days, marked workers were collected  
754 and stored at -80 °C. Ovaries were dissected, pooled (four pairs of ovaries per sample and  
755 Table S6) and total RNA was extracted. Gene expression was determined as above, with  
756 eight biological replicates sampled from each QR and QL colony pair (Table S6).

757 In addition, we tested whether a diet that promotes ovary activation (royal jelly)  
758 affects the expression of *lncov1* and *Tudor-SN* in the ovaries of caged workers exposed or not  
759 to QMP. To do so, we used cDNA libraries from our previous study (Cardoso-Júnior et al.,

760 2021a). Briefly, newly-emerged workers from two source colonies were randomly allocated  
761 to eight cages (4 QMP<sup>+</sup> and 4 QMP<sup>-</sup> each with 150 workers). In four of the cages the workers  
762 (2 QMP<sup>+</sup> and 2 QMP<sup>-</sup>) received a diet composed of 50% honey and 50% royal jelly (Royal  
763 Jelly Australia, stored frozen), while those in the other four cages received a honey diet. Food  
764 was replenished when necessary. The cages were kept in an incubator at 34 °C in the dark for  
765 7 days, when the bees were collected and snap frozen on dry ice and stored at -80 °C. Ovaries  
766 were dissected, and an ovary activation score based on a three-point scale (Ronai et al.,  
767 2016b). Results on the ovary activation scores are published elsewhere (Cardoso-Júnior et al.,  
768 2021a). Eight individual samples, each being a pool of four ovary pairs, were collected from  
769 each cage (Table S6), except for the activated ovaries of the royal jelly diet groups, which  
770 each sample represents a single pair of activated ovaries. With the ovary activation scores and  
771 gene expression data we performed correlation analyses (Fig. S3). RT-qPCR assays for the  
772 target genes of this experiment were done as described above.

### 773 **Sequence determination of *lncov1***

774 As the previously published *lncov1* sequence (Humann et al., 2013) had been  
775 generated by the assembly of 5'3'RACE amplicons from an uncharacterized EST (Humann  
776 and Hartfelder, 2011) it could not be deposited in full length in GenBank. Furthermore, the  
777 first published contig (Humann et al., 2013) contained a partial repeat within the *lncov1*  
778 sequence that was not present in the then available honey bee genome assembly. To obtain  
779 the full length of *lncov1* sequence and resolve the presence or not of the repeat sequence  
780 within *lncov1*, we obtained a full length *lncov1* product by amplification with primers  
781 containing a T7 promoter sequence at the 5' end of the reverse primer (Table S7) and  
782 Platinum *Taq* DNA Polymerase High Fidelity (Thermo Fisher Scientific, Waltham, MA)  
783 using the following conditions: 94 °C for 5 min, followed by 40 cycles of 94 °C for 30  
784 s, 56 °C for 30 s, and 72 °C for 100 s, and a final elongation step at 72 °C for 7 min.

785 Amplicons were visualized by agarose gel electrophoresis (1%), purified with the Illustr  
786 GFX PCR DNA and Gel Band Purification Kit (GE Healthcare) and then cloned into the  
787 pGEM-T Easy Vector (Promega) for transformation of chemically-competent *E. coli* DH5 $\alpha$   
788 cells. We confirmed the completeness of the cloned *lncov1* sequence by Sanger sequencing  
789 of three independent clones. The final *lncov1* contig was assembled in CAP3 (Huang and  
790 Madan, 1999) software from the three forward and three reverse reads) and submitted to  
791 GenBank under the accession number OL505555.

792 *lncov1* has a 97% identity match, with only a 2 bp difference to its genomic scaffold  
793 position 11,932,549 – 11,933,630 (1082 bp) of linkage group 11 in the most recent *A.*  
794 *mellifera* genome assembly (Amel\_HAv3.1) (Wallberg et al., 2019). We found no evidence  
795 of a repeat at its 5' end as originally reported (Humann et al., 2013). The full length *lncov1*  
796 sequence is now deposited in GenBank (accession number OL505555). We also confirmed  
797 the intronic location of *lncov1* in its host gene *LOC726407*, but due to changes in gene  
798 predictions in the most recent, chromosome-level genome assembly of *A. mellifera* (Wallberg  
799 et al., 2019), this is now the fifth intron.

#### 800 **Whole-mount fluorescence *in situ* hybridisation (FISH)**

801 To generate the *lncov1* riboprobes we used primers containing a T7 promoter  
802 sequence (Table S7). Amplification settings were 94 °C for 2 min, 40 cycles of 94 °C for 45  
803 s, 60 °C for 45 s, 72 °C for 1 min, and a final extension step of 72 °C for 10 min. Amplicons  
804 were separated by agarose gel electrophoresis (1%), purified with the Illustr GFX PCR  
805 DNA and Gel Band Purification Kit (GE Healthcare), and then quantified  
806 spectrophotometrically. Subsequently, *lncov1* antisense and sense riboprobes (376 bp)  
807 labeled with Alexa Fluor™ 488 were produced by *in vitro* reverse transcription from the T7  
808 promoter using a FISH Tag RNA Kit (Thermo Fisher Scientific, Waltham, MA).

809 Honey bee ovaries from L4, L5F3, and L5S3 worker larvae were processed as

810 described for *Drosophila melanogaster* ovaries (Saunders and Cohen, 1999). After fixation in  
811 buffered heptane/paraformaldehyde [(82% heptane, 13.12%, HEPES buffer (0.1 M HEPES,  
812 pH 6.9; 2 mM MgSO<sub>4</sub>; and 1 mM EGTA), 0.66% paraformaldehyde and 1.64% DMSO)], the  
813 ovaries were washed with methanol and twice with ethanol 100%, and then stored in ethanol  
814 at -20 °C. Fixed ovaries were rehydrated in methanol, followed by methanol/PTw (PBS 1%  
815 and Tween 0.1%), and finally three times in PTw, and then transferred to a DMSO 1:9  
816 PPTwT solution (paraformaldehyde 4%, PTw, and Triton X-100 0.1%) for 20 min at room  
817 temperature. After five washes in PTw, the ovaries were incubated for 30 s with protease K  
818 (40 mg/mL) and again washed with glycine (10 mg/mL) in PTw. Following two washes with  
819 PTw the ovaries were re-fixed with PPTwT and washed five times in PTw. Before  
820 hybridization, the ovaries were incubated for 10 min in PTw/Hybridization solution (HS:  
821 50% formamide, 4x SSC, 50 mg/mL heparin, 1x Denhardt's solution, 250 mg/mL yeast RNA  
822 and 500 mg/mL salmon testes DNA), and another 10 min with HS only. After 1 h at 45 °C in  
823 fresh HS, the fluorescent RNA riboprobe was added, and hybridization proceeded for 16 h at  
824 45 °C in the dark. The labeled ovaries were washed twice with HS and then, sequentially,  
825 with HS/PTw (3:1), HS/PTw (1:1), HS/PTw (1:3) and PTw. Nuclei were stained with  
826 DAPI/PTw (4000:1) before laser confocal in a TCS-SP5 System (Leica) microscopy  
827 (excitation laser set at 488 nm and emission at 525 nm), capturing optical sections of 0.5 or 1  
828 µm thickness. Leica LAS-AF software was used for image acquisition and processing. No  
829 adjustments were made with respect to image brightness and/or contrast.

830

### 831 **Pull-down assays and mass spectrometry analysis**

832 Recombinant pGEM-T easy vectors used to sequence the *Incov1* full-length were  
833 digested with *EcoRI* (Fermentas) and purified again with the Illustra GFX PCR DNA and Gel  
834 Band Purification Kit (GE Healthcare). *In vitro* reverse transcription was performed using the  
835 RiboMax T7 system (Promega, Madison, WI), and the product was biotinylated using the

836 Pierce RNA 3' End Desthiobiotinylation Kit (Thermo Fisher Scientific, Waltham, MA).  
837 Biotinylated *Incov1* fragments were linked to spherical beads of the Pierce Magnetic RNA-  
838 Protein Pull-Down Kit (Thermo Scientific), and the pull-down was performed according to  
839 the manufacturer's protocol using whole-body protein extracts of L5F3 larvae. Proteins of  
840 these larvae were extracted using RIPA lysis buffer (0.75 M NaCl, 0.5% SDS, 0.25 M Tris,  
841 5% Triton X-100, 100 mM EDTA supplemented with orthovanadate, 100 mM acid sodium  
842 pyrophosphate, 100 mM PMSF, 1% leupeptin), followed by centrifugation at  $10,000 \times g$  for  
843 30 min at room temperature. Three independent pull-down experiments were performed, and  
844 the larval proteins bound to the *Incov1* pull-down beads were eluted following the  
845 manufacturer's assay protocol.

846 The eluted proteins were analyzed by mass spectrometry using a shotgun proteomics  
847 approach (liquid chromatography-electrospray ionization-mass spectrometry, LC-ESI-  
848 MS/MS). After reduction with DTT (45 mM for 1 h at 56 °C), the proteins were alkylated  
849 with iodoacetamide (100 mM for 1 h at room temperature in a dark chamber) and digested  
850 with trypsin (Promega) diluted in ammonium bicarbonate (0.1 M for 24 h at 37 °C).  
851 Trypsination was stopped by the addition of formic acid, and the samples were stored at -20  
852 °C. For the mass spectrometry analysis, the samples were desalted by passage through a  
853 microcolumn containing reverse-phase resin (POROS R2, Perseptive Biosystems, USA),  
854 eluted in 60% methanol containing 5% formic acid, and dried by vacuum centrifugation.  
855 After resuspension in matrix solution (5 mg/mL 4-hydroxy cinnamic acid in 50% acetonitrile  
856 and 0.1% trifluoroacetic acid), the samples were applied to the TOF plate of a MALDI-  
857 TOF/TOF-MS system (Axima Performance, Kratos-Shimadzu, Manchester, UK).

858 The spectrometry results were analyzed in the formats mascot generic and micromass  
859 (PKL) for MALDI-TOF/TOF and electrospray, respectively. The MASCOT MS/MS Ion  
860 Search tool (<http://www.matrixscience.com>) was used, and searches were done against the



861 database NCBI nr and Metazoan taxonomy using the following parameters: Carbamidomethyl  
862 (C) as fixed modifications, Deamidated (NQ) and Oxidation (M) as variable modifications,  
863 peptide tolerance  $\pm 1.2$  Da, MS/MS tolerance  $\pm 0.8$  Da, and peptide charge 1+.

864

#### 865 **RNAi-mediated knockdown of *lncov1* and *Tudor-SN***

866 We designed primers flanked by the T7 sequence for *lncov1* and *Tudor-SN* to amplify  
867 342 bp and 378 bp fragments of *lncov1* (i.e., ds-*lncov1*-I and ds-*lncov1*-II, respectively) and a  
868 323 bp fragment of *Tudor-SN* (i.e., ds-*Tudor-SN*) (Table S7). PCR amplifications were  
869 performed using the following conditions: 95 °C for 3 min, followed by 40 cycles of 95 °C  
870 for 15 s, 60 °C for 30 s, and 72 °C for 1 min, and a final extension step of 72 °C for 7 min.  
871 The respective amplicons were separated by agarose gel electrophoresis (1.2 %), purified  
872 with Illustra™ DNA and Gel Band Purification Kit (GE Healthcare), and then cloned into  
873 pGEM®-T easy vector (Promega). Recombinant plasmids were used to transform chemically-  
874 competent *E. coli* DH5 $\alpha$  cells. Positive clones were extracted with the QIAprep Spin  
875 Miniprep Kit (Qiagen, Hilden, Germany). Double-stranded RNAs (dsRNAs) were *in vitro*  
876 synthesised using the RiboMax T7 System Kit (Promega). As a control we prepared *GFP*  
877 dsRNA from a pGreen Lantern plasmid (Thermo Fisher Scientific) using specific primers  
878 (Table S7).

879 L5F2 worker larvae were collected from brood frames and transferred to plastic cups  
880 containing with 250  $\mu$ L of a diet suitable for rearing worker larvae (Kaftanoglu et al., 2011)  
881 (53% royal jelly, 6% fructose, 6% glycose, 1% yeast extract, and 34% water). To the diet  
882 (250  $\mu$ L) of each larva we added either 1  $\mu$ g of *lncov1* dsRNA, 1  $\mu$ g of *Tudor-SN* dsRNA, 1  
883  $\mu$ g of *GFP* dsRNA (negative control), or 1  $\mu$ L of water (untreated control). The larvae were  
884 kept in an incubator at 34 °C with controlled humidity for 24 hours before dissection of the  
885 ovaries. Three independent replicates were prepared for each of the treatment groups (*ds*-



886 *GFP*, *ds-Tudor-SN*, or *ds-Incov-1*) and six for the untreated control group (see Table S6 for  
887 sample sizes). Knockdown efficiency was assessed using RT-qPCR assays with the  
888 respective primers for the target transcripts (*Incov1* or *Tudor-SN*). The primers for the RT-  
889 qPCR assays were designed so as to avoid overlap with the regions used for the dsRNA  
890 (Table S7). RT-qPCR assays were performed as described below.

891 As we did not achieve a reduction in *Incov1* expression via *in vivo* application of *ds-*  
892 *Incov1*, we next conducted an *in vitro* experiment. We prepared three independent pools of  
893 dissected ovaries from L5F2 worker larvae (n = 3), each consisting of 10 pairs of ovaries  
894 from L5F2 worker larvae, and cultivated these in Grace's insect culture medium for 24 h at  
895 34 °C. Ovaries cultured *in vitro* should require less dsRNA to achieve a successful  
896 knockdown, so we added *Incov1* dsRNA in the range from 10-1000 ng to the culture medium  
897 (200 µL per well). RT-qPCR assays for the target genes of this experiment were performed as  
898 described below.

899

#### 900 **Effector caspase activity assay**

901 Effector caspase activity was assessed using the Caspase-Glo 3/7 Assay System  
902 (Promega) following a previous protocol (Ronai et al., 2016b). The assay was performed on  
903 protein extracts from three independent pools of larval L5F3 ovaries of the *Tudor-SN*  
904 knockdown experiment, each pool consisting of ten pairs of ovaries. The luminescence signal  
905 representing caspase activity was detected in a SpectraMax L Microplate Luminometer  
906 (Promega). The luminescence was then normalized to the protein concentration of the  
907 sample, which was determined by Bradford assay.

908

#### 909 **Juvenile hormone treatment of honey bee larvae**

910 Fourth-instar worker larvae were topically treated with a 10 µg dose of Juvenile  
911 hormone III (Fluka, Buchs, Switzerland) dissolved in acetone (10 µg/µL), as previously

912 described (23). Control larvae received an application of acetone (1  $\mu$ L; solvent control), or  
913 were left untreated. Larvae were collected 6 h later, after they had molted to the L5F1 stage.  
914 Sample sizes of each group are listed in Table S6. The efficiency of the JH treatment was  
915 assessed by analysis of the honey bee *Krüppel homolog-1* gene, which is the immediate  
916 response gene for JH (Bellés, 2020). RT-qPCR assays for the target genes of this experiment  
917 were done as described below.

918

### 919 ***In silico* functional analyses of *lncov1* and Tudor-SN protein**

920 The subcellular locations of *lncov1* and Tudor-SN protein were predicted using iLoc-  
921 LncRNA (<http://lin-group.cn/server/iLoc-LncRNA/predictor.php>) (Su et al., 2018) and  
922 ProtComp v9.0 (Softberry Inc.,  
923 [www.softberry.com/berry.phtml?topic=protcompan&group=programs&subgroup=proloc](http://www.softberry.com/berry.phtml?topic=protcompan&group=programs&subgroup=proloc)),  
924 respectively. Conserved domains encoded by *LOC726407* were identified by the CDART  
925 software (Geer et al., 2002) and Prosite Expasy (<https://prosite.expasy.org/>).

926 To investigate the expression of *lncov1*, *LOC726407*, *Tudor-SN* and *Gapdh* in  
927 published RNA-seq libraries of honey bee ovaries (Chen and Shi, 2020; Chen et al., 2017;  
928 Duncan et al., 2020), raw sequencing data was downloaded from Gene Expression Omnibus  
929 under the following accession codes: GSE120561, GSE93028, GSE119256. Raw reads were  
930 checked for quality with FastQC software v. 0.11.9 and when necessary, trimming was  
931 performed with Fastp v. 0.12.4. To quantify transcript abundance, a custom pipeline was  
932 developed (script is described in Supplementary Material 1). Briefly, we first indexed *lncov1*  
933 transcript to the list of transcripts known to be encoded by the *A. mellifera* genome  
934 (Amel\_HAv3.1). The read count for each transcript was estimated probabilistically by  
935 Kallisto software (Bray et al., 2016) using a bootstrap of 1000x. This software repeats the  
936 transcript counting process in each library by resampling the data to increase accuracy in  
937 counting. This way, each bootstrap is considered a technical replication of a given biological

938 sample. Normalized differential gene expression analyses across different libraries were  
939 performed with Sleuth software (Pimentel et al., 2017) in R (Team, 2018) using the Kallisto  
940 files as input. The pipeline developed for the Sleuth differential expression analysis is  
941 summarized in Supplementary Material 2. An adjusted q-value  $< 0.05$  and a  $\log_2$ -fold change  
942 cutoff  $> 0.5$ , were considered for differential expression analyses. Gene expression of RNA-  
943 seq libraries between Chen et al. studies (Chen and Shi, 2020; Chen et al., 2017) were  
944 directly compared in this study due to their similarities regarding sample collection, RNA-seq  
945 library preparation and sequencing procedures.

946

#### 947 **Evolutionary conservation of *lncov1***

948 The *lncov1* genomic sequence (1080 bp) was used as input for blastn searches against  
949 38 hymenopteran genomes deposited in the Hymenoptera Genome Database – HGD (Elsik et  
950 al., 2018) (<https://hymenoptera.elsiklab.missouri.edu/>).

951

#### 952 **Statistical analyses**

953 For the experiments performed on larvae we used Kruskal-Wallis tests followed by  
954 Dunn's post hoc test as the data distribution failed the Kolmogorov-Smirnov normality test.  
955 The only exception was with the JH-III treatment (Fig. S2D-F), where One-Way ANOVA  
956 with Bonferroni correction was performed, as it passed the Kolmogorov-Smirnov normality  
957 test. In the queen and worker comparison for *Tudor-SN* expression (Fig. 1I), Two-Way  
958 ANOVA with Bonferroni correction was applied, as the data followed a normal distribution  
959 (Kolmogorov-Smirnov normality test). For the experiments with adult honey bee workers,  
960 gene expression was analyzed as a dependent variable in a Generalized Linear Mixed Models  
961 (GLMM), with 'colony' as random effect, and 'diet', 'QMP', or 'social context'  
962 (queenright/queenless) as fixed effects. Two-tailed Student's *t*-tests were used to analyze  
963 gene expression levels of *lncov1* and *Tudor-SN* in individual colonies (Figure 3A-B), or in

964 activated and non-activated ovaries (insets of Figure 3C) as these data passed in the  
965 Kolmogorov-Smirnov normality test. For all analyses, a  $p$ -value  $< 0.05$  was considered  
966 significant. Analyses were performed in GraphPad Prism 7, or in *R* (Team, 2018) using the  
967 packages *lme4* (Bates et al., 2015) and *lsmeans* (Lenth, 2016).

968

#### 969 **Material availability**

970 All data supporting our findings are available in supplementary data files for this manuscript.

971 *Incov1* full sequence is available in GenBank (accession number: OL505555).

972

#### 973 **Data and Code availability**

974 All material and data generated in this study can be directly retrieved from Lead Contact.

975 Original codes used for transcriptome analyses of published RNA-seq datasets are provided  
976 in Material Supplementary 1 and 2.

977

978

979

980

981

982

983

984

### 985 **SUPPLEMENTAL INFORMATION**

986 **Table S1.** Mascot hits for proteins identified by pulldown assays as binding partners to *Apis*  
987 *mellifera Incov1* RNA.

988 **Table S2.** Statistical details of caste-specific relative expression of *Tudor-SN*.

989 **Table S3.** Statistical details for the *Tudor-SN* knockdown *in vivo* experiment.

990 **Table S4.** Statistical details for the JH-III treatment *in vivo* experiment.

991 **Table S5.** Statistical details for experiments with adult bees.

992 **Table S6.** Detailed information of the biological samples collected and analyzed in this  
993 study.

994 **Table S7.** Primer list and their respective sequences, amplification temperature and  
995 reference.

996 **Table S8.** Results of BLASTn searches for *Apis mellifera lncov1* sequence as query in public  
997 Hymenoptera genomes databases.

998 **Supplementary Material 1.** Original scripts used to estimate transcript levels in RNA-seq  
999 libraries.

1000 **Supplementary Material 2.** Original scripts used to perform differential gene expression in  
1001 RNA-seq libraries.

1002

1003

1004

1005

1006

1007

1008

1009

1010

1011

1012

1013

## 1014 **REFERENCES**

1015 Aamidor, S., Cardoso-Júnior, C.A.M., Harianto, J., Nowell, C.J., Cole, L., Oldroyd, B.P., and  
1016 Ronai, I. (2022). Reproductive plasticity and oogenesis in the queen honey bee (*Apis*  
1017 *mellifera*). *J. Insect Physiol.* *136*, 104347. [10.1016/j.jinsphys.2021.104347](https://doi.org/10.1016/j.jinsphys.2021.104347).

1018 Allis, C.D., and Jenuwein, T. (2016). The molecular hallmarks of epigenetic control. *Nat.*  
1019 *Rev. Genet.* *17*, 487–500. [10.1038/nrg.2016.59](https://doi.org/10.1038/nrg.2016.59).

1020 Altaye, S.Z., Pirk, C.W.W., Crewe, R.M., and Nicolson, S.W. (2010). Convergence of  
1021 carbohydrate-biased intake targets in caged worker honeybees fed different protein sources. *J.*  
1022 *Exp. Biol.* *213*, 3311–3318. [10.1242/jeb.046953](https://doi.org/10.1242/jeb.046953).

1023 Alvarado, S., Rajakumar, R., Abouheif, E., and Szyf, M. (2015). Epigenetic variation in the

- 1024 *Egfr* gene generates quantitative variation in a complex trait in ants. *Nat. Commun.* *6*, 6513.  
1025 10.1038/ncomms7513.
- 1026 de Azevedo, S.V., and Hartfelder, K. (2008). The insulin signaling pathway in honey bee  
1027 (*Apis mellifera*) caste development - differential expression of insulin-like peptides and  
1028 insulin receptors in queen and worker larvae. *J. Insect Physiol.* *54*, 1064–1071.  
1029 10.1016/j.jinsphys.2008.04.009.
- 1030 Barchuk, A.R., Cristino, A.S., Kucharski, R., Costa, L.F., Simoes, Z.L., and Maleszka, R.  
1031 (2007). Molecular determinants of caste differentiation in the highly eusocial honeybee *Apis*  
1032 *mellifera*. *BMC Dev. Biol.* *7*, 70. 10.1186/1471-213X-7-70.
- 1033 Bates, D., Mächler, M., Bolker, B.M., and Walker, S.C. (2015). Fitting Linear Mixed-Effects  
1034 Models Using lme4. *J. Stat. Softw.* *67*, 1–48. 10.18637/JSS.V067.I01.
- 1035 Bellés, X. (2020). *Insect metamorphosis – from natural history to regulation of development*  
1036 *and evolution* (London: Academic Press).
- 1037 Blanc, G., Font, B., Eichenberger, D., Moreau, C., Ricard-Blum, S., Hulmes, D.J.S., and  
1038 Moali, C. (2007). Insights into how CUB domains can exert specific functions while sharing  
1039 a common fold: Conserved and specific features of the CUB1 domain contribute to the  
1040 molecular basis of procollagen C-proteinase enhancer-1 activity. *J. Biol. Chem.* *282*, 16924–  
1041 16933. 10.1074/jbc.M701610200.
- 1042 Bomtorin, A.D., Mackert, A., Rosa, G.C., Moda, L.M., Martins, J.R., Bitondi, M.M.,  
1043 Hartfelder, K., and Simoes, Z.L. (2014). Juvenile hormone biosynthesis gene expression in  
1044 the corpora allata of honey bee (*Apis mellifera* L.) female castes. *PLoS One* *9*, e86923.  
1045 10.1371/journal.pone.0086923.
- 1046 Boomsma, J.J., and Gawne, R. (2018). Superorganismality and caste differentiation as points  
1047 of no return: how the major evolutionary transitions were lost in translation. *Biol. Rev.* *93*,  
1048 28–54. 10.1111/brv.12330.
- 1049 Boswell, R.E., and Mahowald, A.P. (1985). Tudor, a gene required for assembly of the germ  
1050 plasm in *Drosophila melanogaster*. *Cell* *43*, 97–104. 10.1016/0092-8674(85)90015-7.
- 1051 Branstetter, M.G., Danforth, B.N., Pitts, J.P., Faircloth, B.C., Ward, P.S., Buffington, M.L.,  
1052 Gates, M.W., Kula, R.R., and Brady, S.G. (2017). Phylogenomic Insights into the evolution  
1053 of stinging wasps and the origins of ants and bees. *Curr. Biol.* *27*, 1019–1025.  
1054 10.1016/j.cub.2017.03.027.
- 1055 Bray, N.L., Pimentel, H., Melsted, P., and Pachter, L. (2016). Near-optimal probabilistic  
1056 RNA-seq quantification. *Nat. Biotechnol.* *34*, 525–527. 10.1038/NBT.3519.
- 1057 Cameron, R.C., Duncan, E.J., and Dearden, P.K. (2013). Biased gene expression in early  
1058 honeybee larval development. *BMC Genomics* *14*, 903. 10.1186/1471-2164-14-903.
- 1059 Cardinal, S., and Danforth, B.N. (2011). The antiquity and evolutionary history of social  
1060 behavior in bees. *PLoS One* *6*, e21086. 10.1371/journal.pone.0021086.
- 1061 Cardoso-Júnior, C.A.M., Silva, R.P., Borges, N.A., de Carvalho, W.J., Walter, S.L., Simoes,  
1062 Z.L.P., Bitondi, M.M.G., Vieira, C.U., Bonetti, A.M., and Hartfelder, K. (2017). Methyl  
1063 farnesoate epoxidase (mfe) gene expression and juvenile hormone titers in the life cycle of a  
1064 highly eusocial stingless bee, *Melipona scutellaris*. *J. Insect Physiol.* *101*, 185–194.  
1065 10.1016/j.jinsphys.2017.08.001.
- 1066 Cardoso-Júnior, C.A.M., Ronai, I., Hartfelder, K., and Oldroyd, B.P. (2020). Queen  
1067 pheromone modulates the expression of epigenetic modifier genes in the brain of honey bee

- 1068 workers. *Biol. Lett.* *16*, 20200440. 10.1098/rsbl.2020.0440.
- 1069 Cardoso-Júnior, C.A.M., Oldroyd, B., and Ronai, I. (2021a). Vitellogenin expression in the  
1070 ovaries of adult honeybee workers provides insights into the evolution of reproductive and  
1071 social traits. *Insect Mol Biol* *30*, 277–286. 10.1111/imb.12694.
- 1072 Cardoso-Júnior, C.A.M., Yagound, B., Ronai, I., Remnant, E.J., Hartfelder, K., and Oldroyd,  
1073 B.P. (2021b). DNA methylation is not a driver of gene expression reprogramming in young  
1074 honey bee workers. *Mol. Ecol.* *30*, 4804–4818. 10.1111/mec.16098.
- 1075 Caudy, A.A., Ketting, R.F., Hammond, S.M., Denli, A.M., Bathorn, A.M.P., Tops, B.B.J.,  
1076 Silva, J.M., Myers, M.M., Hannon, G.J., and Plasterk, R.H.A. (2003). A micrococcal  
1077 nuclease homologue in RNAi effector complexes. *Nature* *425*, 411–414.  
1078 10.1038/nature01956.
- 1079 Chen, X., and Shi, W. (2020). Genome-wide analysis of coding and non-coding RNAs in  
1080 ovary of honey bee workers and queens. *Apidologie* *51*, 777–792. 10.1007/s13592-020-  
1081 00760-7.
- 1082 Chen, X., Ma, C., Chen, C., Lu, Q., Shi, W., Liu, Z., Wang, H., and Guo, H. (2017).  
1083 Integration of lncRNA-miRNA-mRNA reveals novel insights into oviposition regulation in  
1084 honey bees. *PeerJ* *5*, e3881. 10.7717/PEERJ.3881.
- 1085 Chodroff, R.A., Goodstadt, L., Sirey, T.M., Oliver, P.L., Davies, K.E., Green, E.D., Molnár,  
1086 Z., and Ponting, C.P. (2010). Long noncoding RNA genes: conservation of sequence and  
1087 brain expression among diverse amniotes. *Genome Biol.* *11*. 10.1186/GB-2010-11-7-R72.
- 1088 Dallacqua, R.P., and Bitondi, M.M.G. (2014). Dimorphic ovary differentiation in honeybee  
1089 (*Apis mellifera*) larvae involves caste-specific expression of homologs of *Ark* and *Buffy* cell  
1090 death genes. *PLoS One* *9*, e98088. 10.1371/journal.pone.0098088.
- 1091 Duncan, E.J., Hyink, O., and Dearden, P.K. (2016). Notch signalling mediates reproductive  
1092 constraint in the adult worker honeybee. *Nat Commun* *7*, 12427. 10.1038/ncomms12427.
- 1093 Duncan, E.J., Leask, M.P., and Dearden, P.K. (2020). Genome architecture facilitates  
1094 phenotypic plasticity in the honeybee (*Apis mellifera*). *Mol. Biol. Evol.* *37*, 1964–1978.  
1095 10.1093/molbev/msaa057.
- 1096 Elsik, C.G., Tayal, A., Unni, D.R., Burns, G.W., and Hagen, D.E. (2018). Hymenoptera  
1097 genome database: Using HymenopteraMine to enhance genomic studies of hymenopteran  
1098 insects. *Methods Mol. Biol.* *1757*, 513–556. 10.1007/978-1-4939-7737-6\_17.
- 1099 Evans, J.D., and Wheeler, D.E. (1999). Differential gene expression between developing  
1100 queens and workers in the honey bee, *Apis mellifera*. *Proc. Natl. Acad. Sci. U. S. A.* *96*,  
1101 5575–5580. 10.1073/pnas.96.10.5575.
- 1102 Fischman, B.J., Hollis Woodard, S., and Robinson, G.E. (2011). Molecular evolutionary  
1103 analyses of insect societies. *Proc. Natl. Acad. Sci. U. S. A.* *108*, 10847–10854.  
1104 10.1073/pnas.1100301108.
- 1105 Foret, S., Kucharski, R., Pellegrini, M., Feng, S., Jacobsen, S.E., Robinson, G.E., and  
1106 Maleszka, R. (2012). DNA methylation dynamics, metabolic fluxes, gene splicing, and  
1107 alternative phenotypes in honey bees. *Proc. Natl. Acad. Sci. U. S. A.* *109*, 4968–4973.  
1108 10.1073/pnas.1202392109.
- 1109 Fouks, B., Brand, P., Nguyen, H.N., Herman, J., Camara, F., Ence, D., Hagen, D.E., Hoff,  
1110 K.J., Nachweide, S., Romoth, L., et al. (2021). The genomic basis of evolutionary  
1111 differentiation among honey bees. *Genome Res.* *31*, gr.272310.120. 10.1101/GR.272310.120.



- 1112 Friedman, D.A., Johnson, B.R., and Linksvayer, T.A. (2020). Distributed physiology and the  
1113 molecular basis of social life in eusocial insects. *Horm. Behav.* *122*, 104757.  
1114 10.1016/j.yhbeh.2020.104757.
- 1115 Geer, L.Y., Domrachev, M., Lipman, D.J., and Bryant, S.H. (2002). CDART: Protein  
1116 homology by domain architecture. *Genome Res.* *12*, 1619–1623. 10.1101/gr.278202.
- 1117 Glastad, K.M., Hunt, B.G., and Goodisman, M.A.D. (2019). Epigenetics in insects: Genome  
1118 regulation and the generation of phenotypic diversity. *Annu. Rev. Entomol.* *64*, 185–203.  
1119 10.1146/annurev-ento-011118-111914.
- 1120 Hartfelder, K., Tiberio, G.J., Lago, D.C., Dallacqua, R., and Bitondi, M.G. (2018). The ovary  
1121 and its genes—developmental processes underlying the establishment and function of a  
1122 highly divergent reproductive system in the female castes of the honey bee, *Apis mellifera*.  
1123 *Apidologie* *49*, 49–70. 10.1007/s13592-017-0548-9.
- 1124 Hezroni, H., Koppstein, D., Schwartz, M.G., Avrutin, A., Bartel, D.P., and Ulitsky, I. (2015).  
1125 Principles of long noncoding RNA evolution derived from direct comparison of  
1126 transcriptomes in 17 species. *Cell Rep.* *11*, 1110–1122. 10.1016/j.celrep.2015.04.023.
- 1127 Huang, X., and Madan, A. (1999). CAP3: A DNA sequence assembly program. *Genome Res.*  
1128 *9*, 868–877. 10.1101/GR.9.9.868.
- 1129 Humann, F.C., and Hartfelder, K. (2011). Representational Difference Analysis (RDA)  
1130 reveals differential expression of conserved as well as novel genes during caste-specific  
1131 development of the honey bee (*Apis mellifera* L.) ovary. *Insect Biochem. Mol. Biol.* *41*, 602–  
1132 612. 10.1016/j.ibmb.2011.03.013.
- 1133 Humann, F.C., Tiberio, G.J., and Hartfelder, K. (2013). Sequence and expression  
1134 characteristics of long noncoding RNAs in honey bee caste development—potential novel  
1135 regulators for transgressive ovary size. *PLoS One* *8*, e78915. 10.1371/journal.pone.0078915.
- 1136 Kaftanoglu, O., Linksvayer, T.A., and Page, R.E. (2011). Rearing honey bees, *Apis mellifera*,  
1137 *in vitro* 1: Effects of sugar concentrations on survival and development. *J. Insect Sci.* *11*, 96.  
1138 10.1673/031.011.9601.
- 1139 Kapheim, K.M., Jones, B.M., Pan, H., Li, C., Harpur, B.A., Kent, C.F., Zayed, A., Ioannidis,  
1140 P., Waterhouse, R.M., Kingwell, C., et al. (2020). Developmental plasticity shapes social  
1141 traits and selection in a facultatively eusocial bee. *Proc. Natl. Acad. Sci. U. S. A.* *117*, 13615–  
1142 13625. 10.1073/pnas.2000344117.
- 1143 Kiya, T., Ugajin, A., Kunieda, T., and Kubo, T. (2012). Identification of *kakusei*, a nuclear  
1144 non-coding RNA, as an immediate early gene from the honeybee, and its application for  
1145 neuroethological study. *Int. J. Mol. Sci.* 10.3390/ijms131215496.
- 1146 Korb, J., and Heinze, J. (2016). Major hurdles for the evolution of sociality. *Annu. Rev.*  
1147 *Entomol.* *61*, 297–316. 10.1146/annurev-ento-010715-023711.
- 1148 Kucharski, R., Maleszka, J., Foret, S., and Maleszka, R. (2008). Nutritional control of  
1149 reproductive status in honeybees via DNA methylation. *Science* *319*, 1827–1830.  
1150 10.1126/science.1153069.
- 1151 Lago, D.C., Humann, F.C., Barchuk, A.R., Abraham, K.J., and Hartfelder, K. (2016).  
1152 Differential gene expression underlying ovarian phenotype determination in honey bee, *Apis*  
1153 *mellifera* L., caste development. *Insect Biochem. Mol. Biol.* *79*, 1–12.  
1154 10.1016/j.ibmb.2016.10.001.
- 1155 Leimar, O., Hartfelder, K., Laubichler, M.D., and Page Jr., R.E. (2012). Development and



- 1156 evolution of caste dimorphism in honey bees – a modeling approach. *Ecol. Evol.* 2, 3098–  
1157 3109. 10.1002/ece3.414.
- 1158 Lenth, R. V. (2016). Least-squares means: The R package lsmeans. *J. Stat. Softw.* 69, 1–33.  
1159 10.18637/JSS.V069.I01.
- 1160 Lin, H., and Winston, M.L. (1998). The role of nutrition and temperature in the ovarian  
1161 development of the worker honey bee (*Apis mellifera*). *Can. Entomol.* 130, 883–891.  
1162 10.4039/Ent130883-6.
- 1163 Linksvayer, T.A., and Johnson, B.R. (2019). Re-thinking the social ladder approach for  
1164 elucidating the evolution and molecular basis of insect societies. *Curr. Opin. Insect Sci.* 34,  
1165 123–129. 10.1016/j.cois.2019.07.003.
- 1166 Linksvayer, T.A., Rueppell, O., Siegel, A., Kaftanoglu, O., Page, R.E., and Amdam, G. V.  
1167 (2009). The genetic basis of transgressive ovary size in honeybee workers. *Genetics* 183,  
1168 693–707. 10.1534/genetics.109.105452.
- 1169 Liu, F., Shi, T., Qi, L., Su, X., Wang, D., Dong, J., and Huang, Z.Y. (2019). lncRNA profile  
1170 of *Apis mellifera* and its possible role in behavioural transition from nurses to foragers. *BMC*  
1171 *Genomics* 20, 393. 10.1186/s12864-019-5664-7.
- 1172 Loda, A., and Heard, E. (2019). Xist RNA in action: Past, present, and future. *PLoS Genet.*  
1173 15. 10.1371/JOURNAL.PGEN.1008333.
- 1174 Lopez-Ezquerria, A., Harrison, M.C., and Bornberg-Bauer, E. (2017). Comparative analysis  
1175 of lincRNA in insect species. *BMC Evol. Biol.* 17, 155. 10.1186/s12862-017-0985-0.
- 1176 Lourenço, A.P., Mackert, A., Cristino, A.S., and Simoes, Z.L. (2008). Validation of reference  
1177 genes for gene expression studies in the honey bee, *Apis mellifera*, by quantitative real-time  
1178 RT-PCR. *Apidologie* 39, 372–385. 10.1051/apido:2008015.
- 1179 Ma, L., Bajic, V.B., and Zhang, Z. (2013). On the classification of long non-coding RNAs.  
1180 *RNA Biol.* 10, 924. 10.4161/rna.24604.
- 1181 Ma, M., Xiong, W., Hu, F., Deng, M.F., Huang, X., Chen, J.G., Man, H.Y., Lu, Y., Liu, D.,  
1182 and Zhu, L.Q. (2020). A novel pathway regulates social hierarchy via lncRNA AtLAS and  
1183 postsynaptic synapsin IIb. *Cell Res.* 30, 105–118. 10.1038/S41422-020-0273-1.
- 1184 Michener, C.D. (1974). *The social behavior of the bees* (Harvard University Press).
- 1185 Oi, C.A., van Zweden, J.S., Oliveira, R.C., Van Oystaeyen, A., Nascimento, F.S., and  
1186 Wenseleers, T. (2015). The origin and evolution of social insect queen pheromones: Novel  
1187 hypotheses and outstanding problems. *BioEssays* 37, 808–821. 10.1002/bies.201400180.
- 1188 Oxley, P.R., Thompson, G.J., and Oldroyd, B.P. (2008). Four quantitative trait loci that  
1189 influence worker sterility in the honeybee (*Apis mellifera*). *Genetics* 179, 1337–1343.  
1190 10.1534/genetics.108.087270.
- 1191 Patel, A., Fondrk, M.K., Kaftanoglu, O., Emore, C., Hunt, G., Frederick, K., and Amdam, G.  
1192 V (2007). The making of a queen: TOR pathway is a key player in diphenic caste  
1193 development. *PLoS One* 2, e509. 10.1371/journal.pone.0000509.
- 1194 de Paula Junior, D.E., de Oliveira, M.T., Bruscadin, J.J., Pinheiro, D.G., Bomtorin, A.D.,  
1195 Coelho Junior, V.G., Moda, L.M., Simões, Z.L.P., and Barchuk, A.R. (2020). Caste-specific  
1196 gene expression underlying the differential adult brain development in the honeybee *Apis*  
1197 *mellifera*. *Insect Mol. Biol.* 30, 42–56. 10.1111/imb.12671.
- 1198 Pfaffl, M.W., Tichopad, A., Prgomet, C., and Neuvians, T.P. (2004). Determination of stable

- 1199 housekeeping genes, differentially regulated target genes and sample integrity: BestKeeper -  
1200 Excel-based tool using pair-wise correlations. *Biotechnol. Lett.* *26*, 509–515.  
1201 10.1023/B:BILE.0000019559.84305.47.
- 1202 Pimentel, H., Bray, N.L., Puente, S., Melsted, P., and Pachter, L. (2017). Differential analysis  
1203 of RNA-seq incorporating quantification uncertainty. *Nat. Methods* *14*, 687–690.  
1204 10.1038/NMETH.4324.
- 1205 Rachinsky, A., Strambi, C., Strambi, A., and Hartfelder, K. (1990). Caste and  
1206 metamorphosis: Hemolymph titers of juvenile hormone and ecdysteroids in last instar  
1207 honeybee larvae. *Gen. Comp. Endocrinol.* *79*, 31–38. 10.1016/0016-6480(90)90085-Z.
- 1208 Rehan, S.M., and Toth, A.L. (2015). Climbing the social ladder: The molecular evolution of  
1209 sociality. *Trends Ecol. Evol.* *30*, 426–433. 10.1016/j.tree.2015.05.004.
- 1210 Ronai, I., Oldroyd, B.P., Barton, D.A., Cabanes, G., Lim, J., and Vergoz, V. (2016a).  
1211 Anarchy is a molecular signature of worker sterility in the honey bee. *Mol. Biol. Evol.* *33*,  
1212 134–142. 10.1093/molbev/msv202.
- 1213 Ronai, I., Oldroyd, B.P., and Vergoz, V. (2016b). Queen pheromone regulates programmed  
1214 cell death in the honey bee worker ovary. *Insect Mol. Biol.* *25*, 646–652. 10.1111/imb.12250.
- 1215 Ronai, I., Vergoz, V., and Oldroyd, B.P. (2016c). The mechanistic, genetic, and evolutionary  
1216 basis of worker sterility in the social Hymenoptera. *Adv. Study Behav.* *48*, 251–317.  
1217 10.1016/bs.asb.2016.03.002.
- 1218 Ronai, I., Allsopp, M.H., Tan, K., Dong, S., Liu, X., Vergoz, V., and Oldroyd, B.P. (2017).  
1219 The dynamic association between ovariole loss and sterility in adult honeybee workers. *Proc.*  
1220 *R. Soc. B Biol. Sci.* *284*, 20162693. 10.1098/rspb.2016.2693.
- 1221 Saunders, C., and Cohen, R.S. (1999). The role of oocyte transcription, the 5'UTR, and  
1222 translation repression and derepression in *Drosophila* gurken mRNA and protein localization.  
1223 *Mol. Cell* *3*, 43–54. 10.1016/S1097-2765(00)80173-2.
- 1224 Sawata, M., Takeuchi, H., and Kubo, T. (2004). Identification and analysis of the minimal  
1225 promoter activity of a novel noncoding nuclear RNA gene, *AncR-1*, from the honeybee (*Apis*  
1226 *mellifera* L.). *RNA* *10*, 1047–1058. 10.1261/rna.5231504.
- 1227 Schmidt-Capella, I., and Hartfelder, K. (1998). Juvenile hormone effect on DNA synthesis  
1228 and apoptosis in caste-specific differentiation of the larval honey bee (*Apis mellifera* L.)  
1229 ovary. *J. Insect Physiol.* *44*, 385–391. 10.1016/s0022-1910(98)00027-4.
- 1230 Sherman, P.W., Lacey, E.A., Reeve, H.K., and Keller, L. (1995). The eusociality continuum.  
1231 *Behav. Ecol.* *6*, 102–108. 10.1016/0169-5347(96)91655-9.
- 1232 Shields, E.J., Sheng, L., Weiner, A.K., Garcia, B.A., and Bonasio, R. (2018). High-Quality  
1233 Genome Assemblies Reveal Long Non-coding RNAs Expressed in Ant Brains. *Cell Rep.* *23*,  
1234 3078–3090. 10.1016/j.celrep.2018.05.014.
- 1235 Slessor, K.N., Winston, M.L., and Le Conte, Y. (2005). Pheromone communication in the  
1236 honeybee (*Apis mellifera* L.). *J. Chem. Ecol.* *31*, 2731–2745. 10.1007/S10886-005-7623-9.
- 1237 Sommer, R.J. (2020). Phenotypic plasticity: From theory and genetics to current and future  
1238 challenges. *Genetics* *215*, 1–13. 10.1534/genetics.120.303163.
- 1239 Su, Z.D., Huang, Y., Zhang, Z.Y., Zhao, Y.W., Wang, D., Chen, W., Chou, K.C., and Lin, H.  
1240 (2018). ILoc-lncRNA: Predict the subcellular location of lncRNAs by incorporating octamer  
1241 composition into general PseKNC. *Bioinformatics* *34*, 4196–4204.  
1242 10.1093/bioinformatics/bty508.

- 1243 Sundström, J.F., Vaculova, A., Smertenko, A.P., Savenkov, E.I., Golovko, A., Minina, E.,  
1244 Tiwari, B.S., Rodriguez-Nieto, S., Zamyatnin, A.A., Välineva, T., et al. (2009). Tudor  
1245 staphylococcal nuclease is an evolutionarily conserved component of the programmed cell  
1246 death degradome. *Nat. Cell Biol.* *11*, 1347–1354. 10.1038/ncb1979.
- 1247 Team, R.C. (2018). R: A language and environment for statistical computing. R foundation  
1248 for statistical computing, Vienna, Austria. URL: <http://www.R-project.org/>.
- 1249 Thompson, G.J., and Oldroyd, B.P. (2004). Evaluating alternative hypotheses for the origin  
1250 of eusociality in corbiculate bees. *Mol. Phylogenet. Evol.* *33*, 452–456.  
1251 10.1016/j.ympev.2004.06.016.
- 1252 Traynor, K.S., Le Conte, Y., and Page, R.E. (2014). Queen and young larval pheromones  
1253 impact nursing and reproductive physiology of honey bee (*Apis mellifera*) workers. *Behav.*  
1254 *Ecol. Sociobiol.* *68*, 2059–2073. 10.1007/S00265-014-1811-Y.
- 1255 Ueno, T., Nakaoka, T., Takeuchi, H., and Kubo, T. (2009). Differential gene expression in  
1256 the hypopharyngeal glands of worker honeybees (*Apis mellifera* L.) associated with an age-  
1257 dependent role change. *Zoolog. Sci.* *26*, 557–563. 10.2108/zsj.26.557.
- 1258 Wallberg, A., Bunikis, I., Pettersson, O.V., Mosbech, M.B., Childers, A.K., Evans, J.D.,  
1259 Mikheyev, A.S., Robertson, H.M., Robinson, G.E., and Webster, M.T. (2019). A hybrid de  
1260 novo genome assembly of the honeybee, *Apis mellifera*, with chromosome-length scaffolds.  
1261 *BMC Genomics* *20*, 275. 10.1186/s12864-019-5642-0.
- 1262 Wilson, E.O., and Hölldobler, B. (2005). Eusociality: Origin and consequences. *Proc. Natl.*  
1263 *Acad. Sci. U. S. A.* *102*, 13367–13371. 10.1073/pnas.0505858102.
- 1264 Wojciechowski, M., Lowe, R., Maleszka, J., Conn, D., Maleszka, R., and Hurd, P.J. (2018).  
1265 Phenotypically distinct female castes in honey bees are defined by alternative chromatin  
1266 states during larval development. *Genome Res.* *28*, 1532–1542. 10.1101/gr.236497.118.
- 1267 Xie, Y.F., Shang, F., Ding, B.Y., Wu, Y.B., Niu, J.Z., Wei, D., Dou, W., Christiaens, O.,  
1268 Smagghe, G., and Wang, J.J. (2019). Tudor knockdown disrupts ovary development in  
1269 *Bactrocera dorsalis*. *Insect Mol. Biol.* *28*, 136–144. 10.1111/imb.12533.
- 1270 Yan, H., Simola, D.F., Bonasio, R., Liebig, J., Berger, S.L., and Reinberg, D. (2014).  
1271 Eusocial insects as emerging models for behavioural epigenetics. *Nat. Rev. Genet.* *15*, 677–  
1272 688. 10.1038/nrg3787.
- 1273



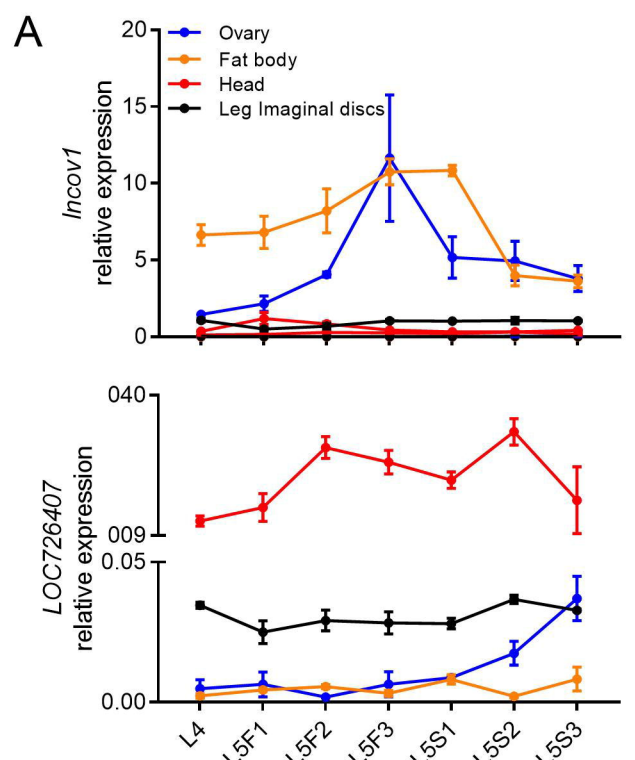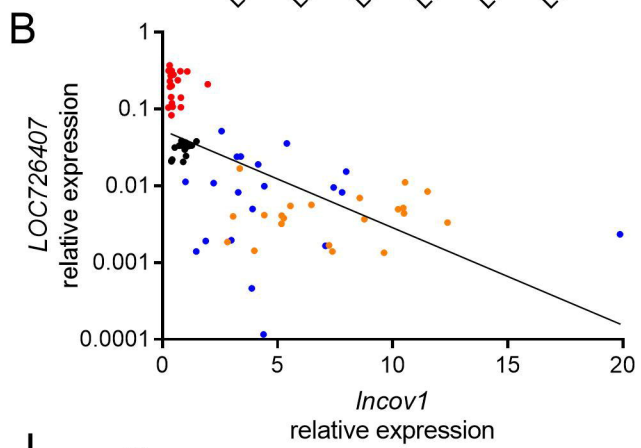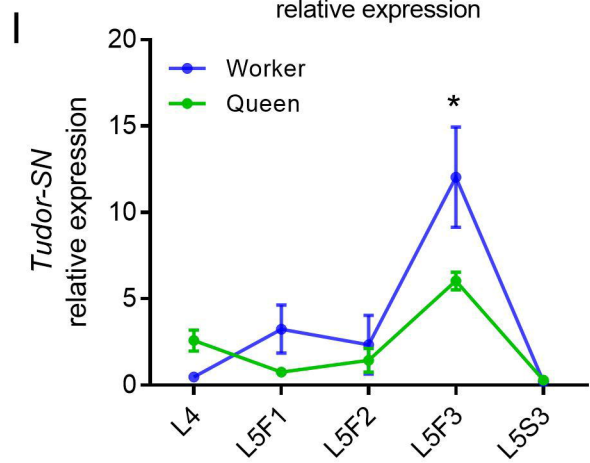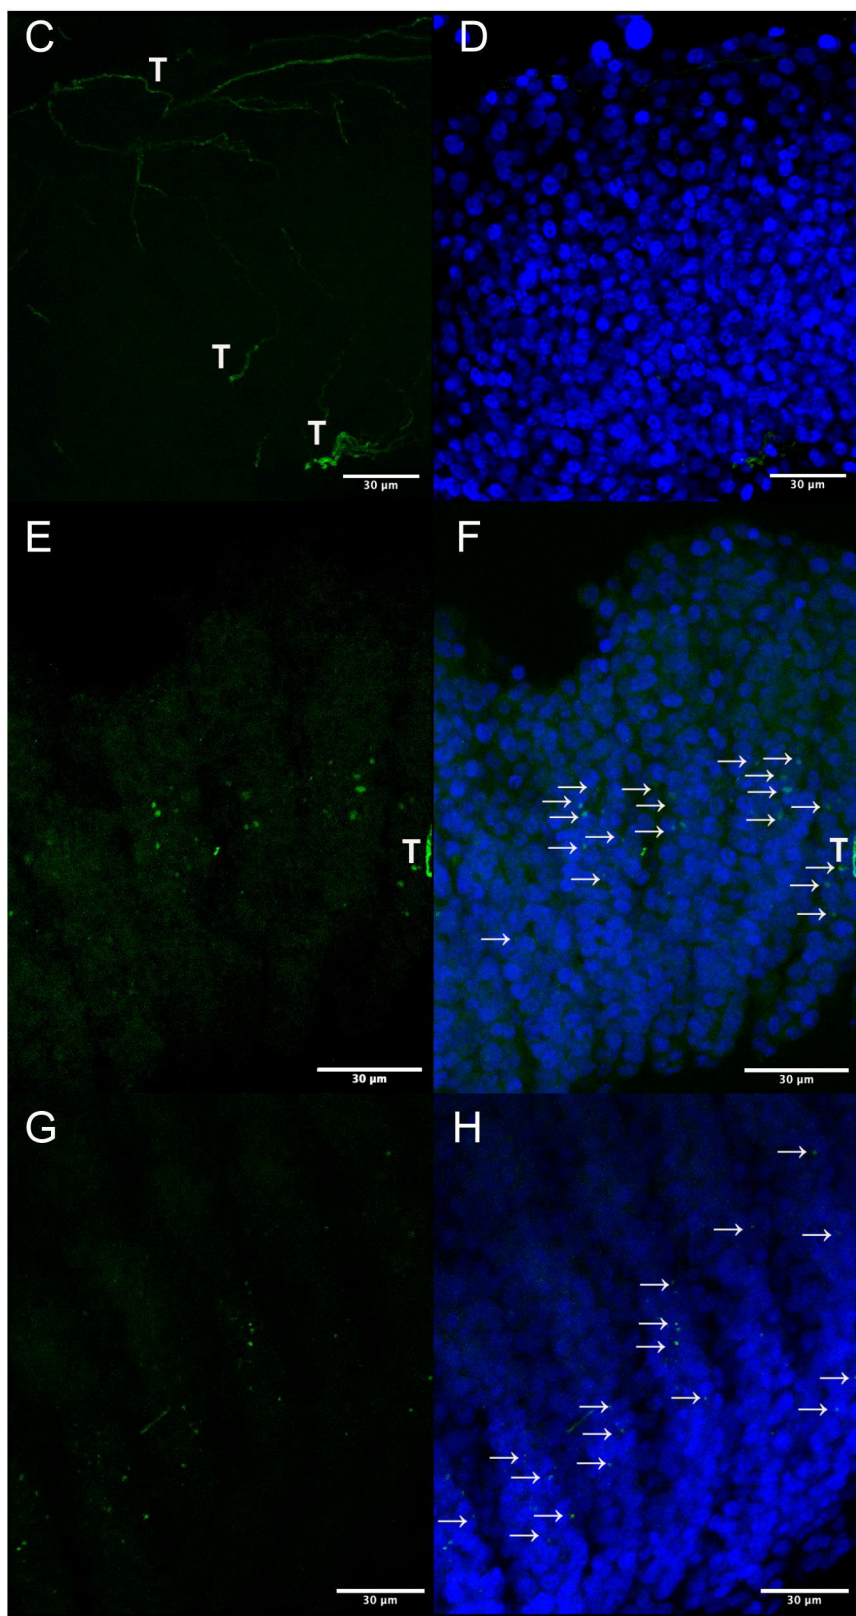

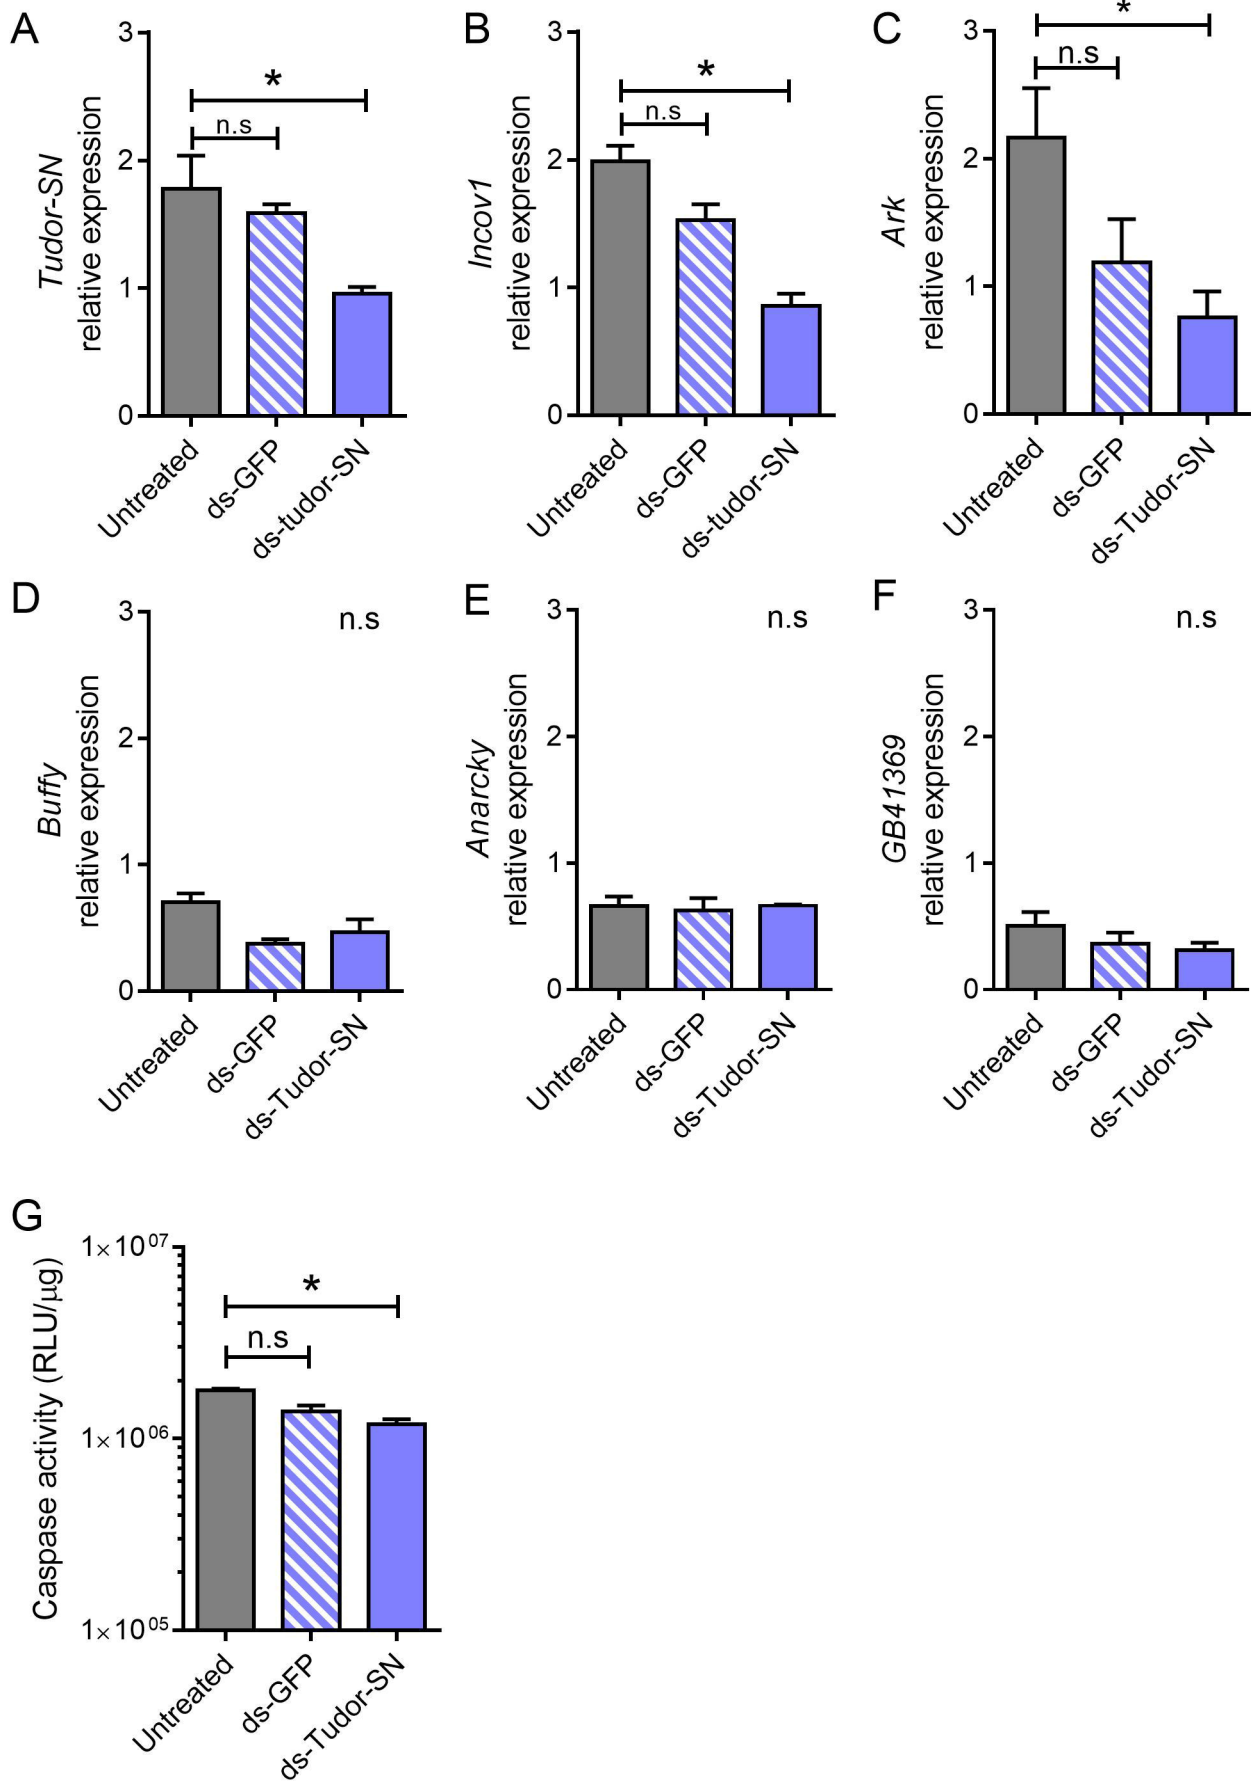

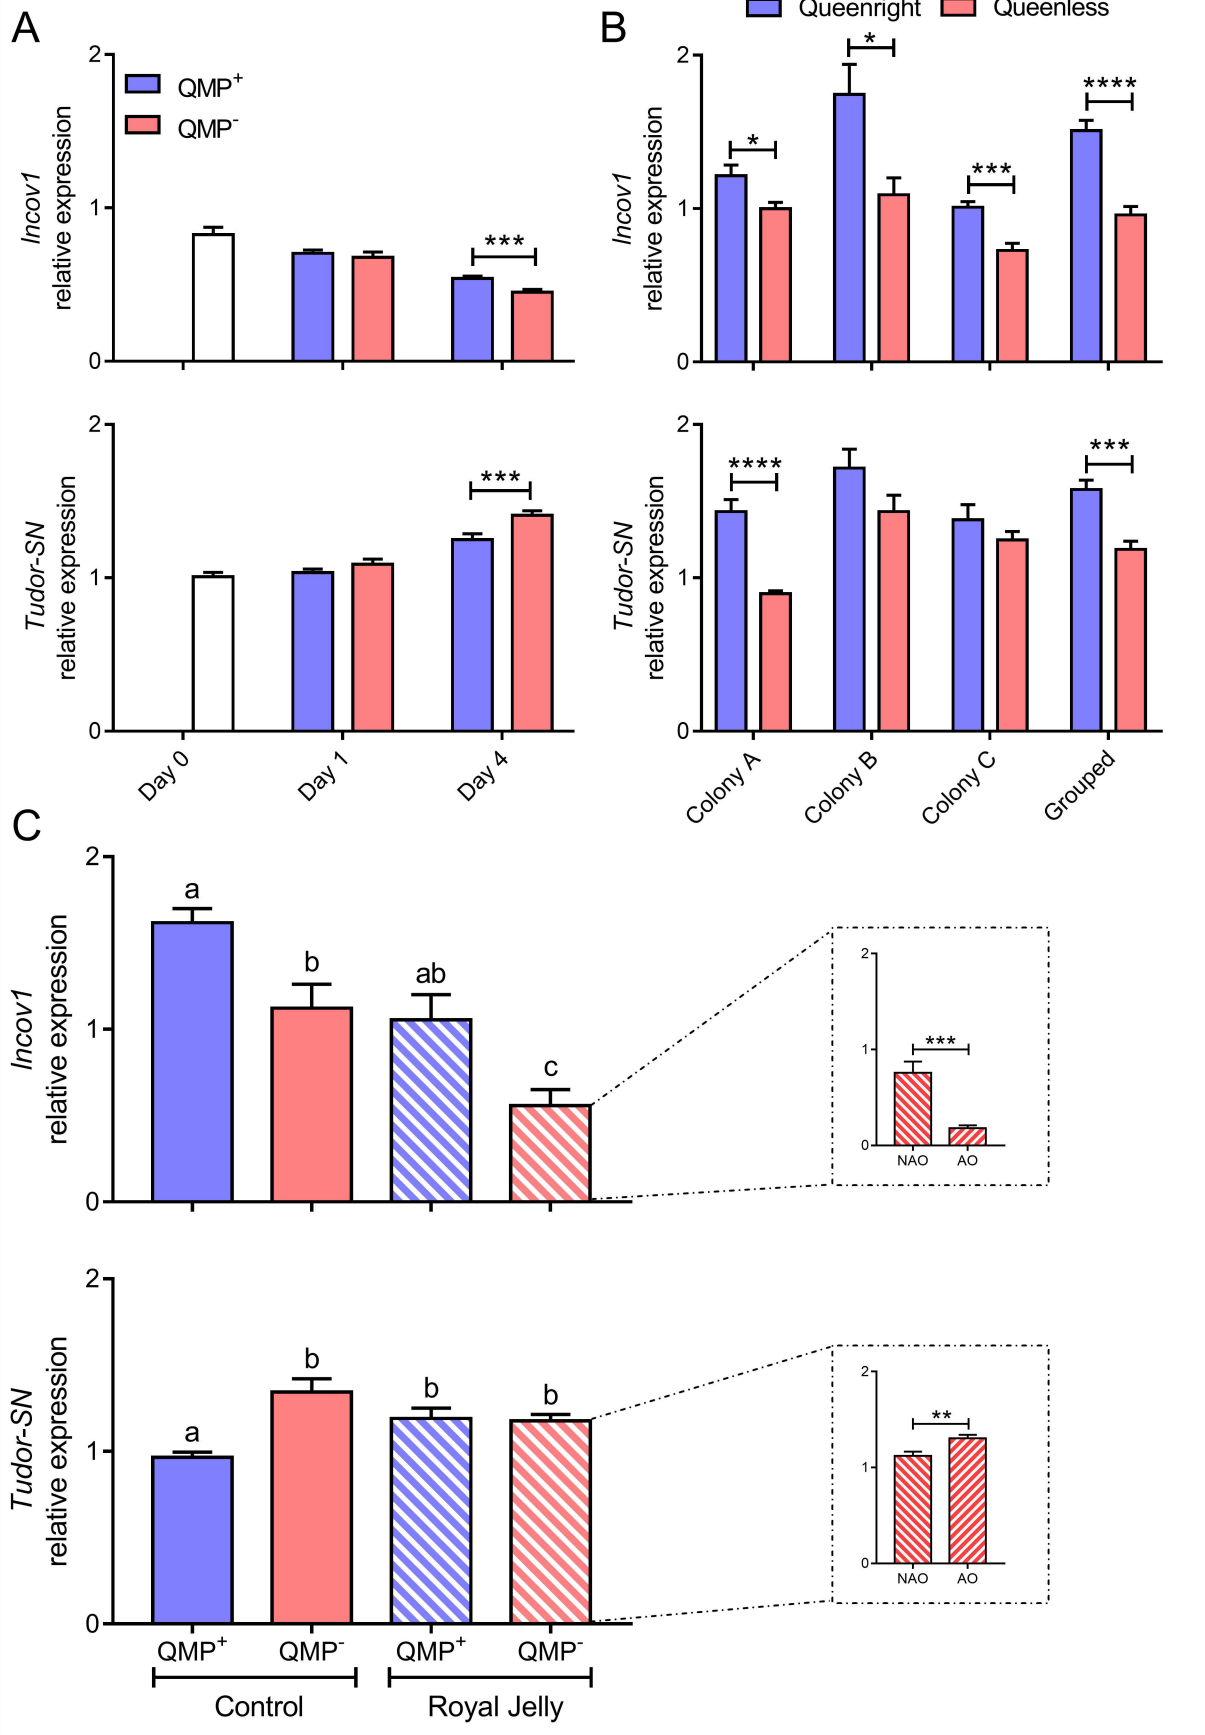

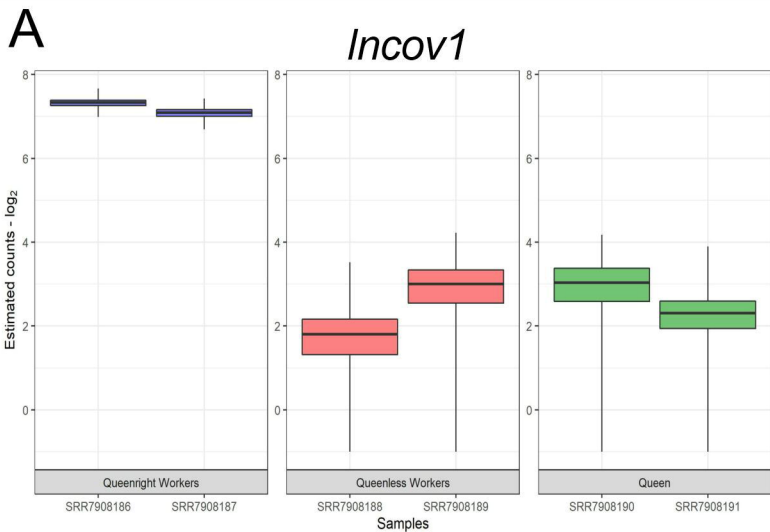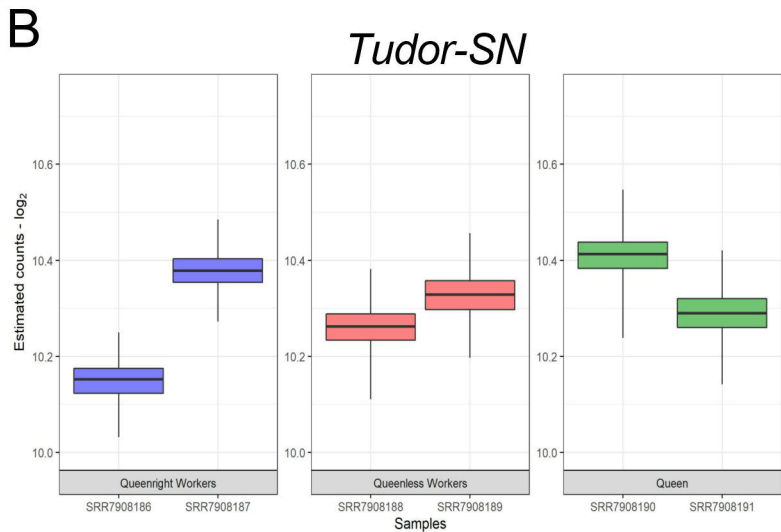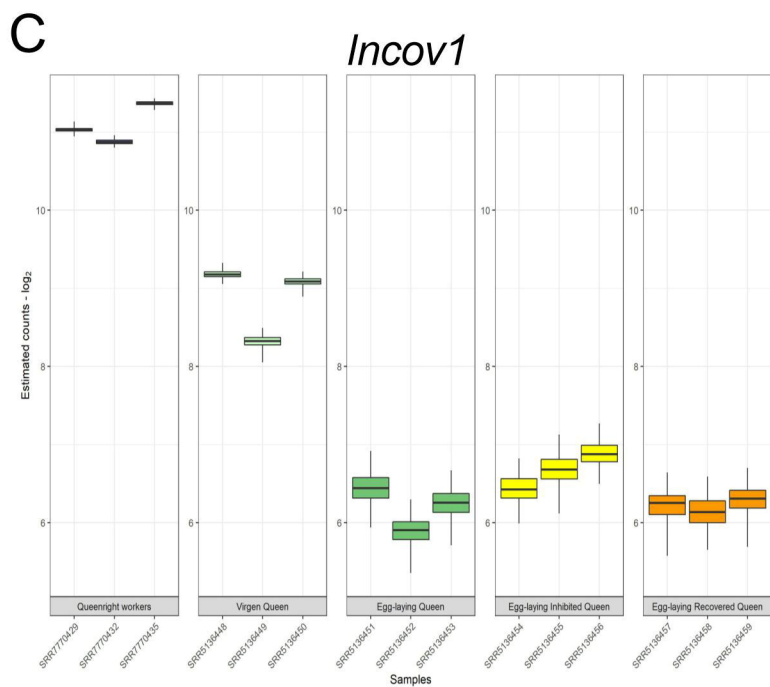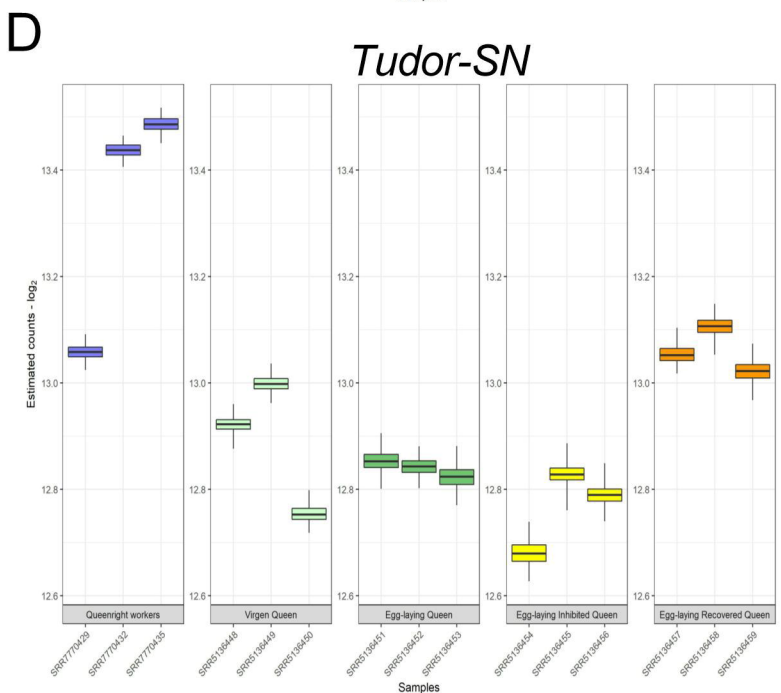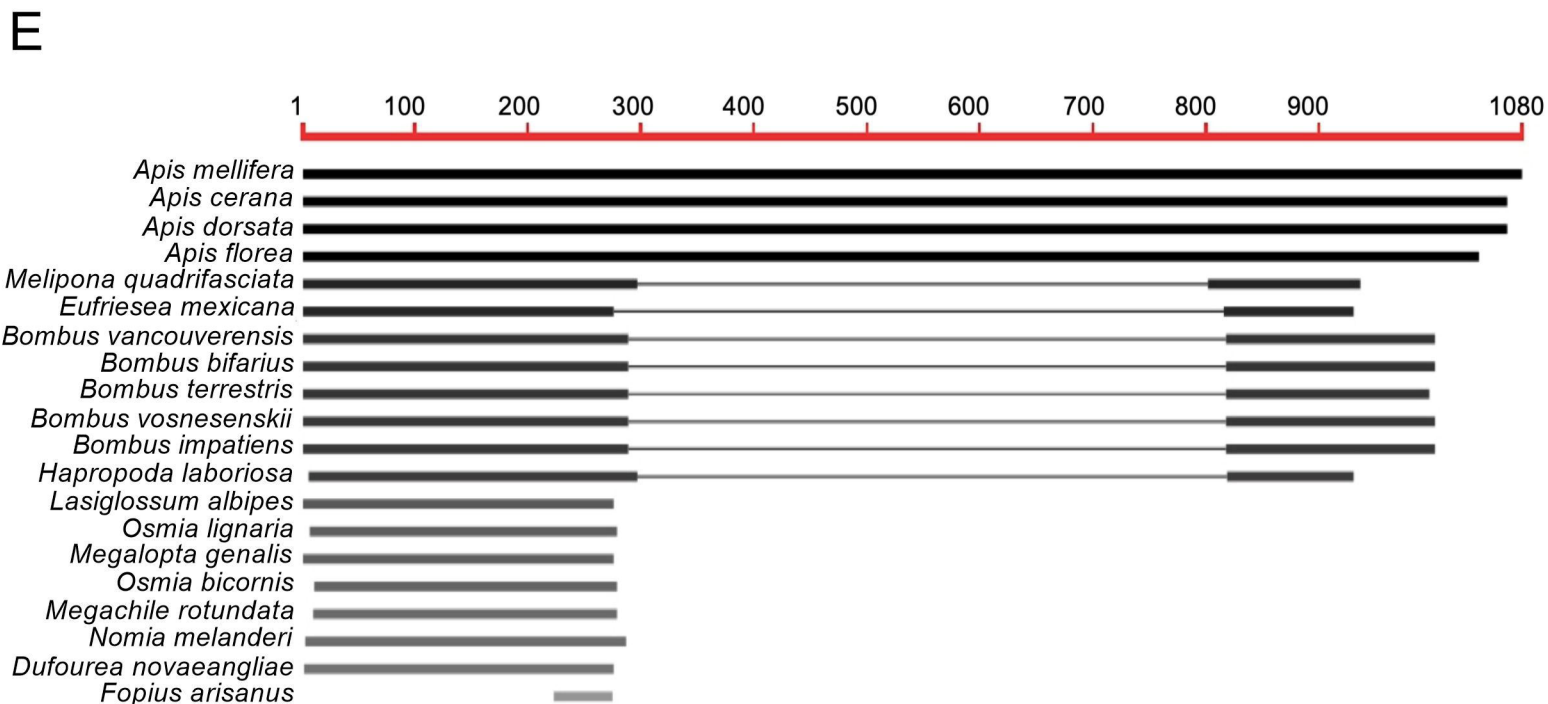



## Larval development

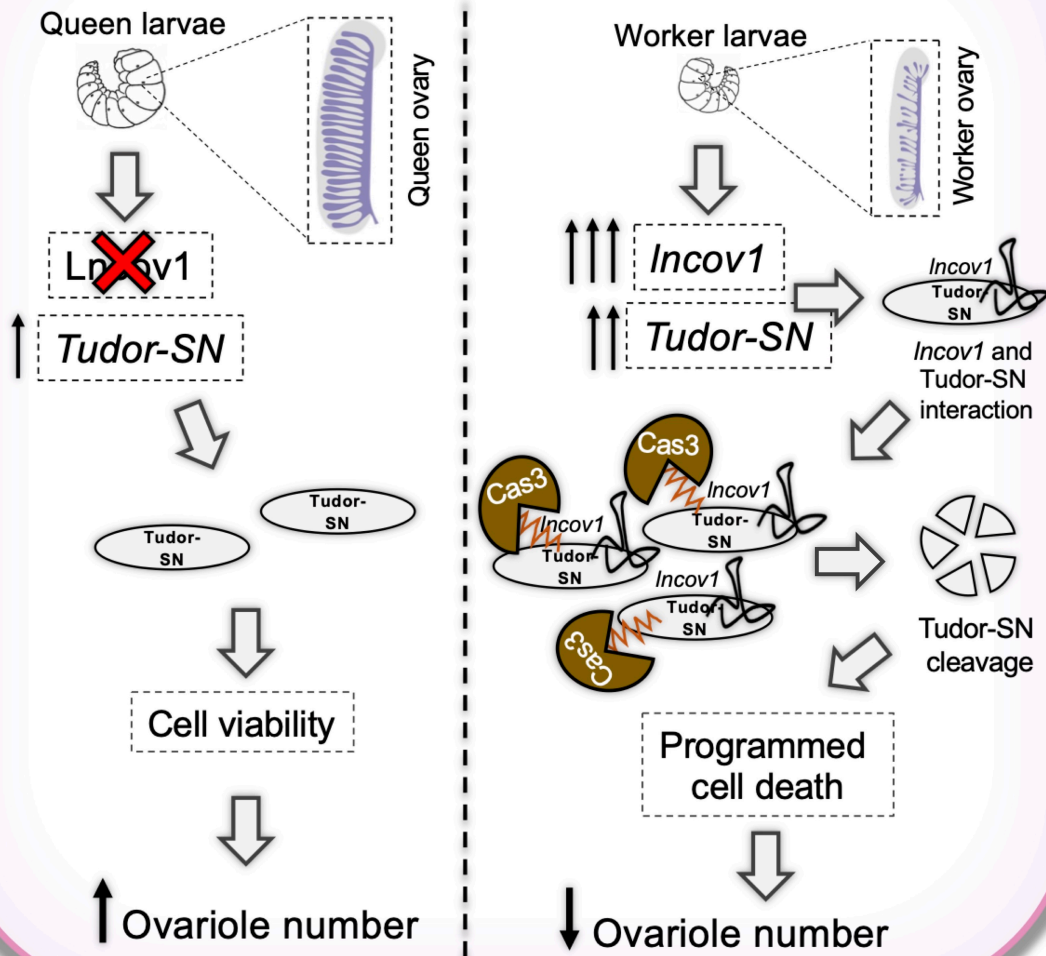

## Adults

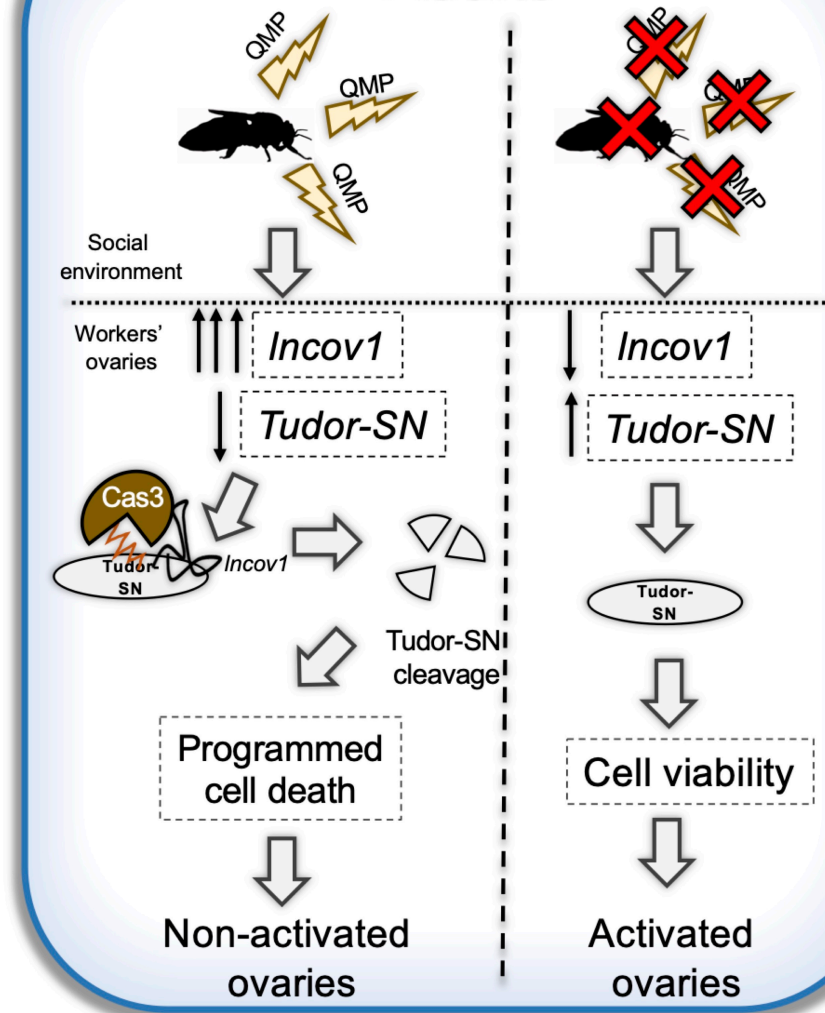

Source: https://www.biorxiv.org/content/10.1101/2022.05.10.491402v1.full.pdf
